# Supplementary material for: Synthesis of glycoconjugate fragments of mycobacterial phosphatidylinositol mannosides and lipomannan
Source: publisher site journal article supplement (doi:10.3762/bjoc.7.47), 2011-03-28
Supplement: Additional file 2 [file 1860-5397-7-47-S2.pdf]

## Supporting Information File 2

for

### Synthesis of glycoconjugate fragments of mycobacterial phosphatidylinositol mannosides and lipomannan

Benjamin Cao, Jonathan M. White and Spencer J. Williams\*

Address: School of Chemistry and Bio21 Molecular Science and Biotechnology Institute,  
University of Melbourne, Parkville, Victoria, Australia, Fax: +61 3 9347 8124; Tel: +61 3 8344  
2422

E-mail: Spencer J. Williams\* - [sjwill@unimelb.edu.au](mailto:sjwill@unimelb.edu.au)

\* Corresponding author

**<sup>1</sup>H and <sup>13</sup>C NMR spectra for new compounds and fluorescence spectra for 5–7**

#### Table of contents

|                                                                                                      |   |
|------------------------------------------------------------------------------------------------------|---|
| <i>Azidooctyl α-D-mannopyranoside (12)</i> .....                                                     | 4 |
| <i>8-Azidooctyl 6-O-(tert-butyldiphenylsilyl)-α-D-mannopyranoside</i> .....                          | 5 |
| <i>8-Azidooctyl 2,3,4-tri-O-benzoyl-6-O-(tert-butyldiphenylsilyl)-α-D-mannopyranoside (13)</i> ..... | 6 |
| <i>8-Azidooctyl 2,3,4-tri-O-benzoyl-α-D-mannopyranoside (14)</i> .....                               | 7 |
| <i>3,4,6-Tri-O-benzoyl-1,2-O-(S)-benzylidene-β-D-mannopyranose (18)</i> .....                        | 8 |
| <i>4-Methylphenyl 2-O-acetyl-3,4,6-tri-O-benzoyl-1-thio-α-D-mannopyranoside (17)</i> .....           | 9 |

|                                                                                                                                                                                                                          |    |
|--------------------------------------------------------------------------------------------------------------------------------------------------------------------------------------------------------------------------|----|
| 8-Azidooctyl 3,4-di-O-(2,3-dimethoxybutane-2,3-diyl)- $\alpha$ -D-mannopyranoside (15).....                                                                                                                              | 10 |
| 8-Azidooctyl (2,3,4,6-tetra-O-benzoyl- $\alpha$ -D-mannopyranosyl)-(1 $\rightarrow$ 6)-2,3,4-tri-O-benzoyl- $\alpha$ -D-mannopyranoside (20).....                                                                        | 11 |
| 8-Azidooctyl ( $\alpha$ -D-mannopyranosyl)-(1 $\rightarrow$ 6)- $\alpha$ -D-mannopyranoside (1).....                                                                                                                     | 12 |
| 8-Azidooctyl (2,3,4-tri-O-benzoyl-6-O-(tert-butyldiphenylsilyl)- $\alpha$ -D-mannopyranosyl)-(1 $\rightarrow$ 6)-2,3,4-tri-O-benzoyl- $\alpha$ -D-mannopyranoside (23) .....                                             | 13 |
| 8-Azidooctyl (2,3,4-tri-O-benzoyl- $\alpha$ -D-mannopyranosyl)-(1 $\rightarrow$ 6)-2,3,4-tri-O-benzoyl- $\alpha$ -D-mannopyranoside (24).....                                                                            | 14 |
| 8-Azidooctyl (2,3,4,6-tetra-O-benzoyl- $\alpha$ -D-mannopyranosyl)-(1 $\rightarrow$ 6)-(2,3,4-tri-O-benzoyl- $\alpha$ -D-mannopyranosyl)-(1 $\rightarrow$ 6)-2,3,4-tri-O-benzoyl- $\alpha$ -D-mannopyranoside (25).....  | 15 |
| 8-Azidooctyl ( $\alpha$ -D-mannopyranosyl)-(1 $\rightarrow$ 6)-( $\alpha$ -D-mannopyranosyl)-(1 $\rightarrow$ 6)- $\alpha$ -D-mannopyranoside (2).....                                                                   | 16 |
| 8-Azidooctyl (2-O-acetyl-3,4,6-tri-O-benzoyl- $\alpha$ -D-mannopyranosyl)-(1 $\rightarrow$ 6)-2,3,4-tri-O-benzoyl- $\alpha$ -D-mannopyranoside (26).....                                                                 | 17 |
| 8-Azidooctyl (3,4,6-tri-O-benzoyl- $\alpha$ -D-mannopyranosyl)-(1 $\rightarrow$ 6)-2,3,4-tri-O-benzoyl- $\alpha$ -D-mannopyranoside (27).....                                                                            | 18 |
| 8-Azidooctyl (2,3,4-tri-O-benzoyl- $\alpha$ -D-mannopyranosyl)-(1 $\rightarrow$ 2)-(3,4,6-tri-O-benzoyl- $\alpha$ -D-mannopyranosyl)-(1 $\rightarrow$ 6)-2,3,4,6-tetra-O-benzoyl- $\alpha$ -D-mannopyranoside (28) ..... | 19 |
| 8-Azidooctyl ( $\alpha$ -D-mannopyranosyl)-(1 $\rightarrow$ 2)-( $\alpha$ -D-mannopyranosyl)-(1 $\rightarrow$ 6)- $\alpha$ -D-mannopyranoside (3).....                                                                   | 20 |
| Azidooctyl 2,6-di-O-(2,3,4,6-tetra-O-benzoyl- $\alpha$ -D-mannopyranosyl)-3,4-di-O-(2,3-dimethoxybutane-2,3-diyl)- $\alpha$ -D-mannopyranoside (29).....                                                                 | 21 |
| Azidooctyl 2,6-di-O- $\alpha$ -D-mannopyranosyl- $\alpha$ -D-mannopyranoside (4).....                                                                                                                                    | 22 |
| 4-[(7-Nitrobenzofurazan-4-yl)aminomethyl]-triazol-1-yl-octyl ( $\alpha$ -D-mannopyranosyl)-(1 $\rightarrow$ 6)- $\alpha$ -D-mannopyranoside (5) .....                                                                    | 23 |
| 4-[(7-Nitrobenzofurazan-4-yl)aminomethyl]-triazol-1-yl-octyl ( $\alpha$ -D-mannopyranosyl)-(1 $\rightarrow$ 6)-( $\alpha$ -D-mannopyranosyl)-(1 $\rightarrow$ 6)- $\alpha$ -D-mannopyranoside (6).....                   | 24 |
| 4-[(7-Nitrobenzofurazan-4-yl)aminomethyl]-triazol-1-yl-octyl ( $\alpha$ -D-mannopyranosyl)-(1 $\rightarrow$ 2)-( $\alpha$ -D-mannopyranosyl)-(1 $\rightarrow$ 6)- $\alpha$ -D-mannopyranoside (7) .....                  | 25 |
| 8-(2-Ethoxycylobutene-3,4-dione-1-ylamino)octyl ( $\alpha$ -D-mannopyranosyl)-(1 $\rightarrow$ 6)-( $\alpha$ -D-mannopyranosyl)-(1 $\rightarrow$ 6)- $\alpha$ -D-mannopyranoside (8) .....                               | 26 |
| 8-(2-Ethoxycylobutene-3,4-dione-1-ylamino)octyl ( $\alpha$ -D-mannopyranosyl)-(1 $\rightarrow$ 2)-( $\alpha$ -D-mannopyranosyl)-(1 $\rightarrow$ 6)- $\alpha$ -D-mannopyranoside (9) .....                               | 27 |

*8-(2-Ethoxycylobutene-3,4-dione-1-ylamino)octyl 2,6-di-O- $\alpha$ -D-mannopyranosyl- $\alpha$ -D-mannopyranoside (10)*.....28

*Figure 1: Fluorescence emission spectra of the NBD-labelled neoglycoconjugates 5–7.* .....29

*Figure 2: 125 MHz  $^1\text{H}$  coupled  $^{13}\text{C}$  spectra of trisaccharides 25, 28 and 29.  $^1\text{J}_{\text{C,H}}$  values of anomeric carbons are indicated.*.....30

# Azidoethyl $\alpha$ -D-mannopyranoside (12)

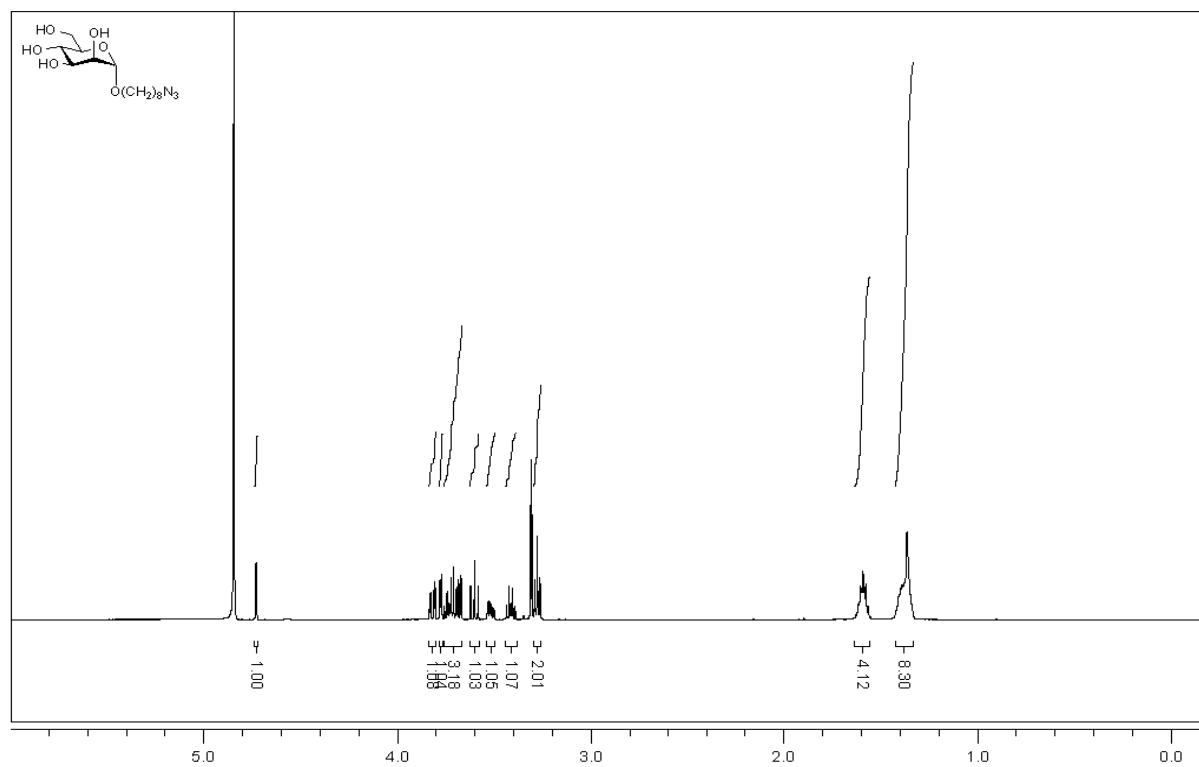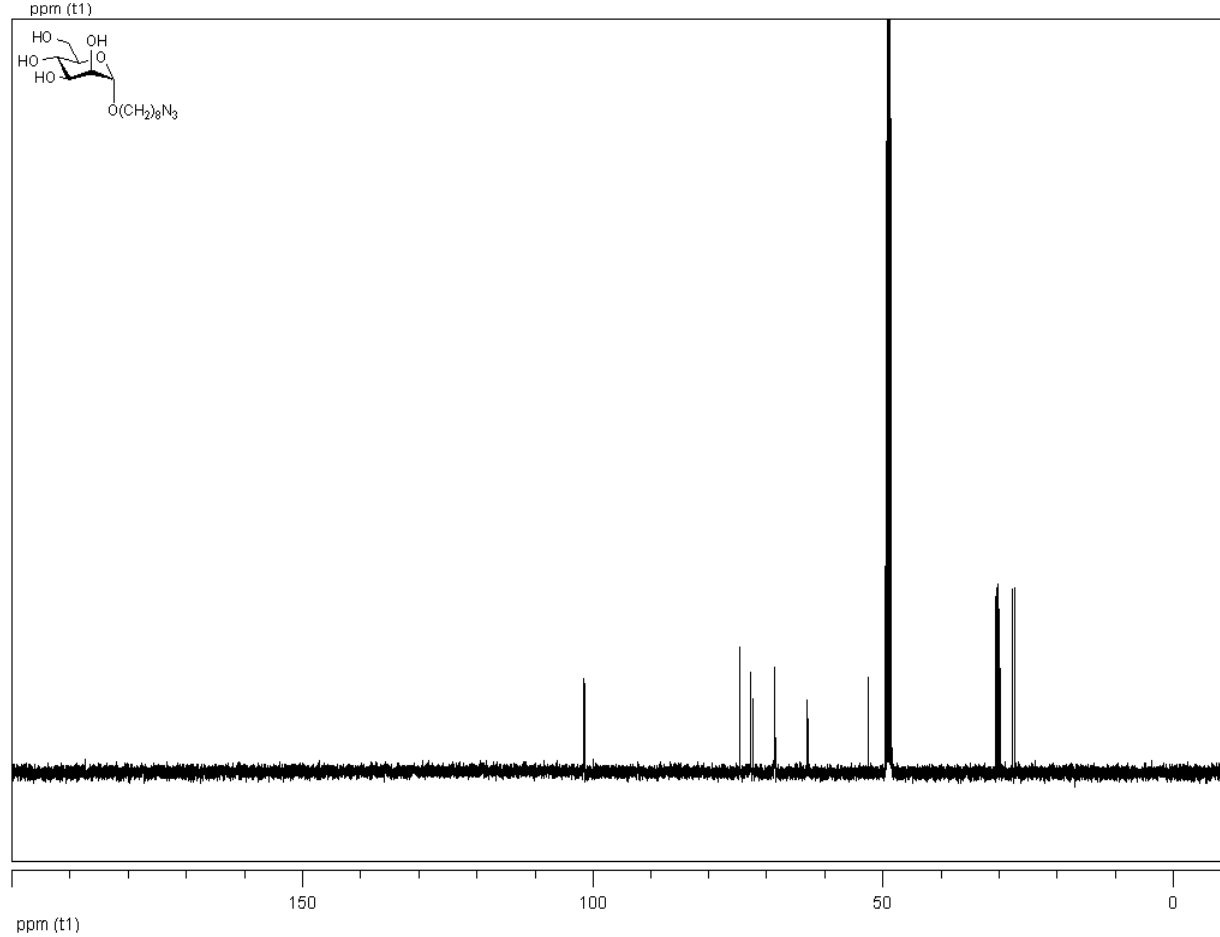

# 8-Azidooctyl 6-O-(tert-butyl-diphenylsilyl)- $\alpha$ -D-mannopyranoside

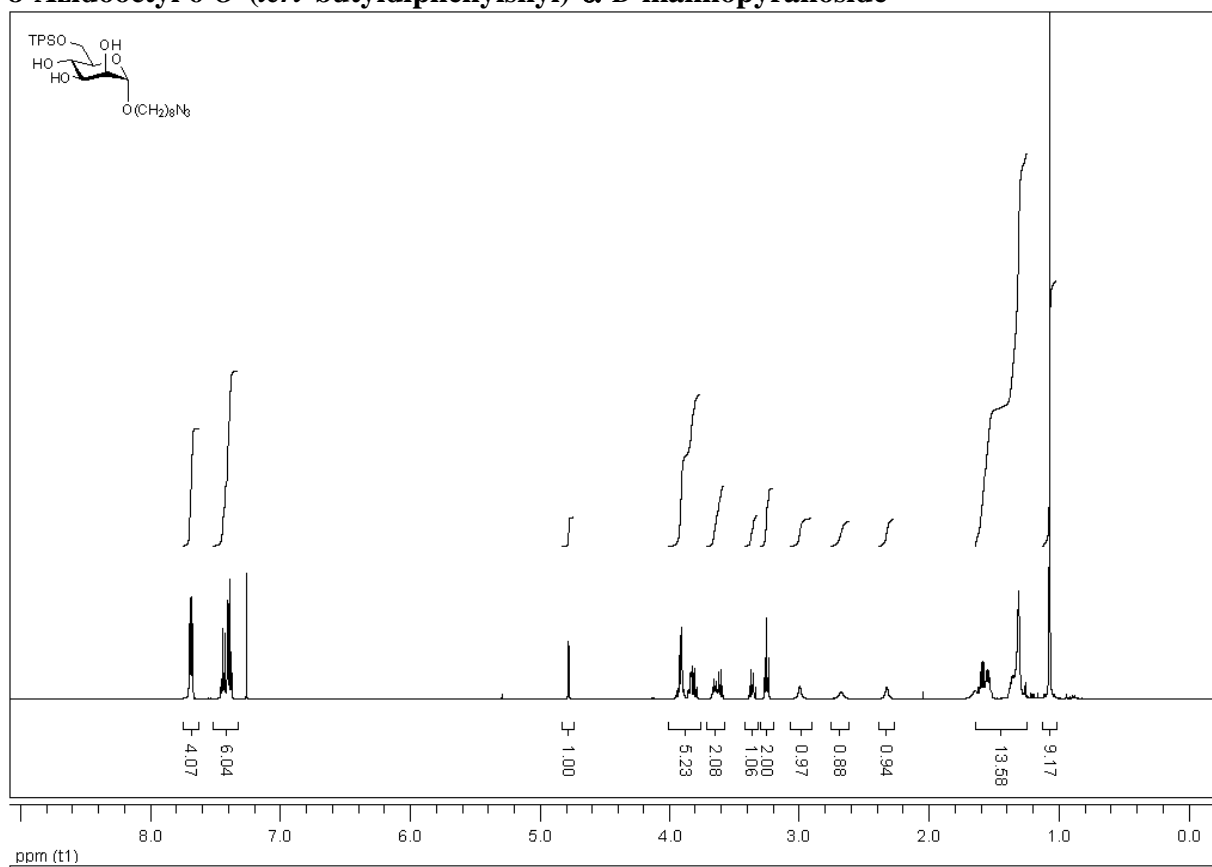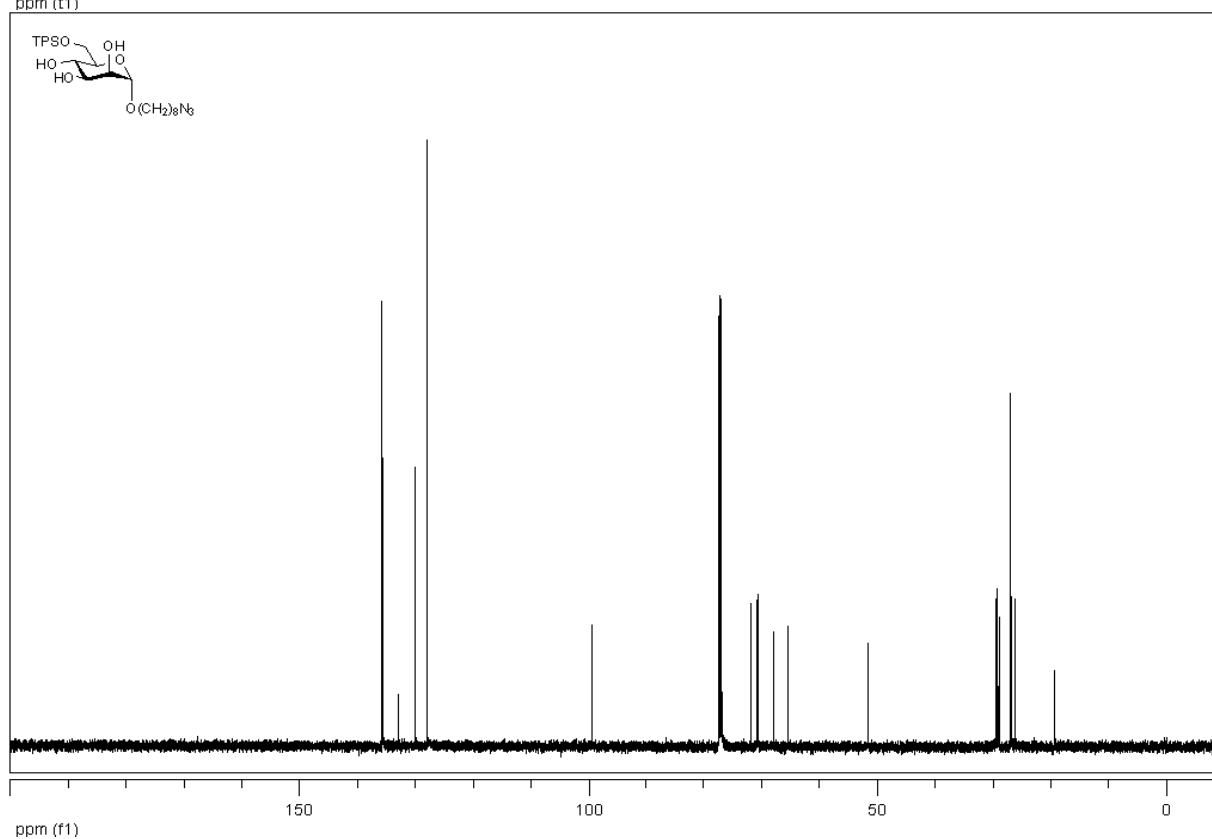

# 8-Azidooctyl 2,3,4-tri-*O*-benzoyl-6-*O*-(*tert*-butyldiphenylsilyl)- $\alpha$ -D-mannopyranoside (13)

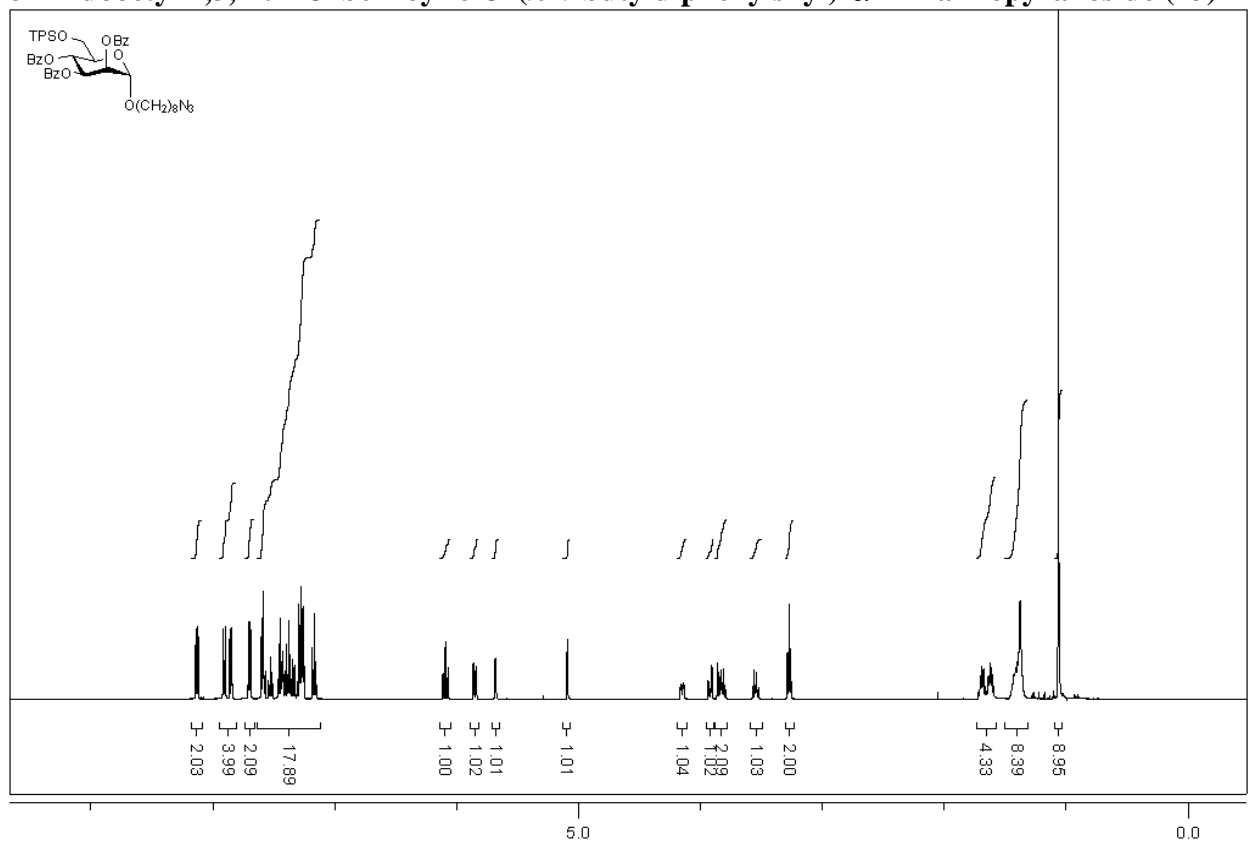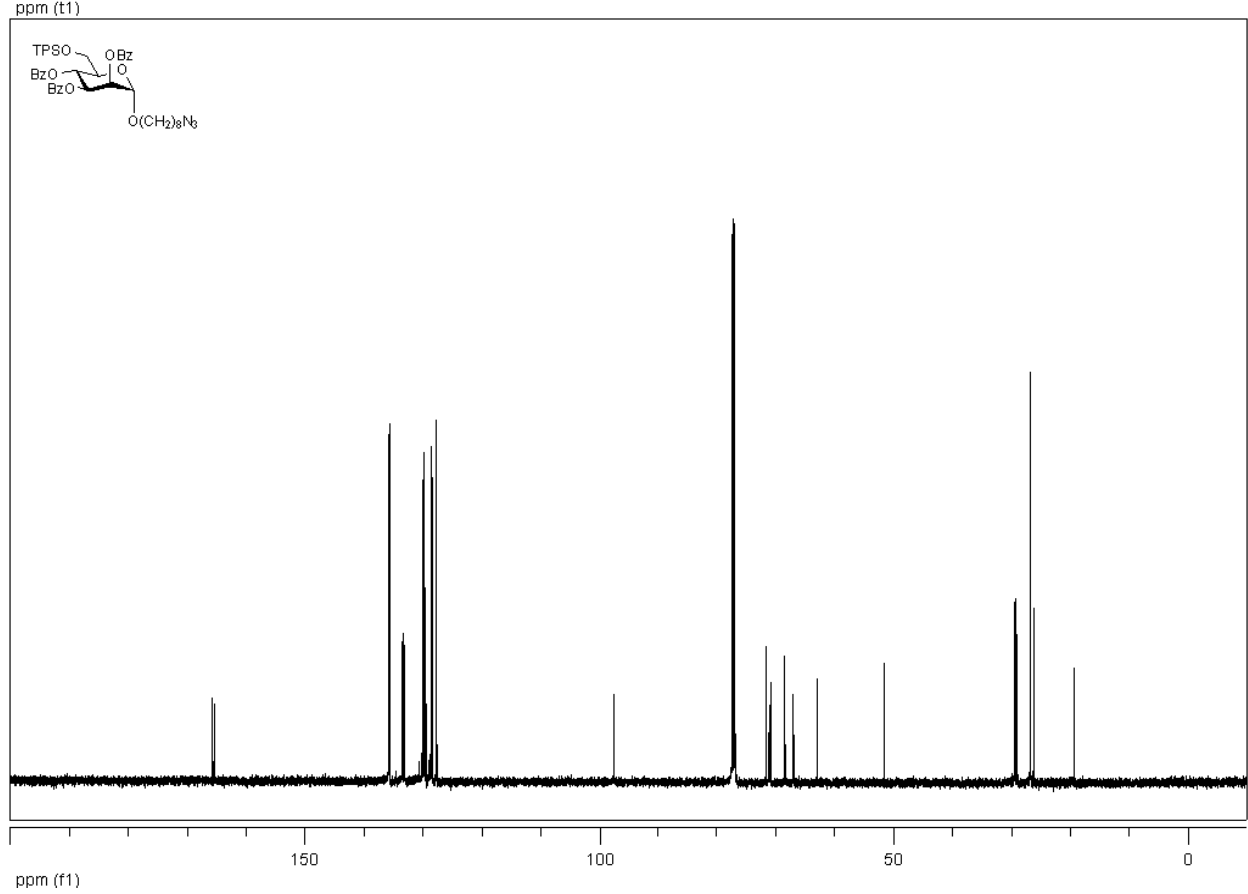

# 8-Azidoctyl 2,3,4-tri-O-benzoyl- $\alpha$ -D-mannopyranoside (14)

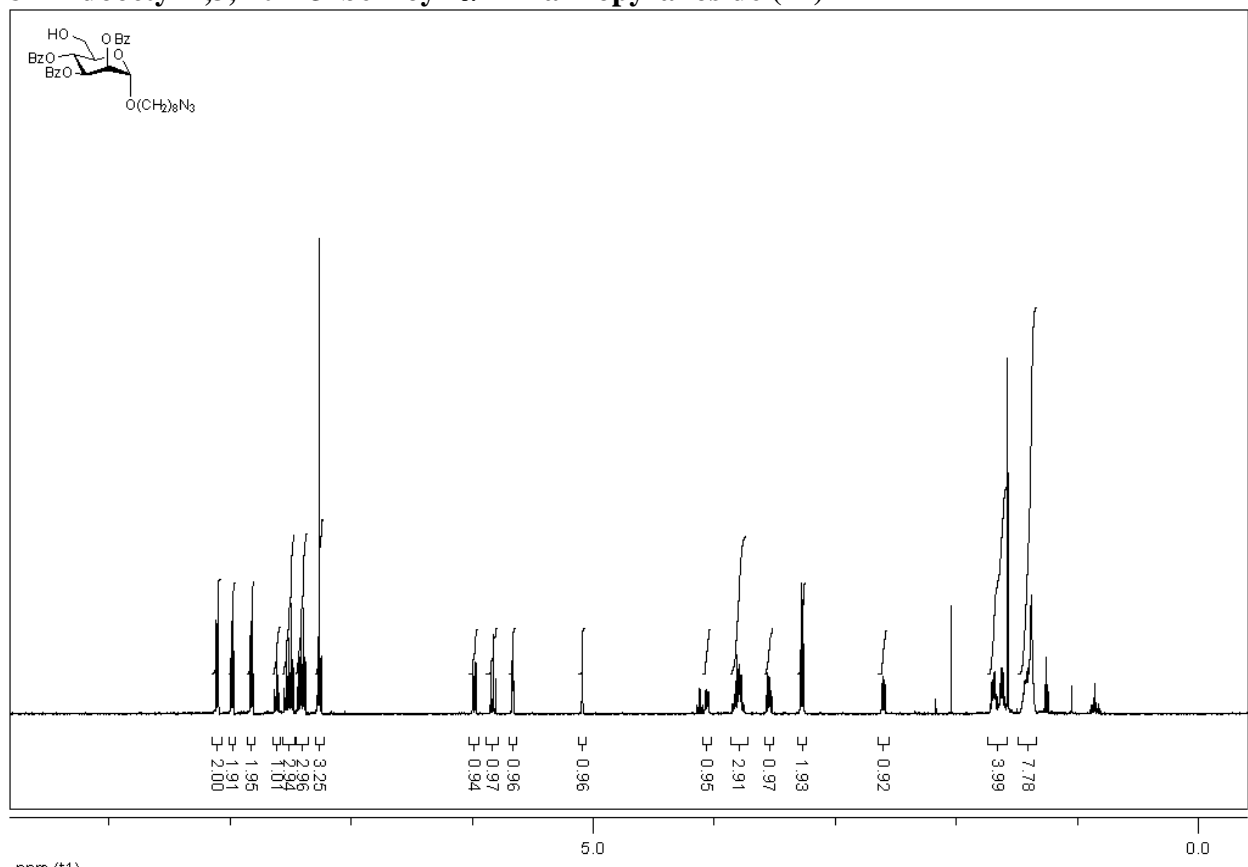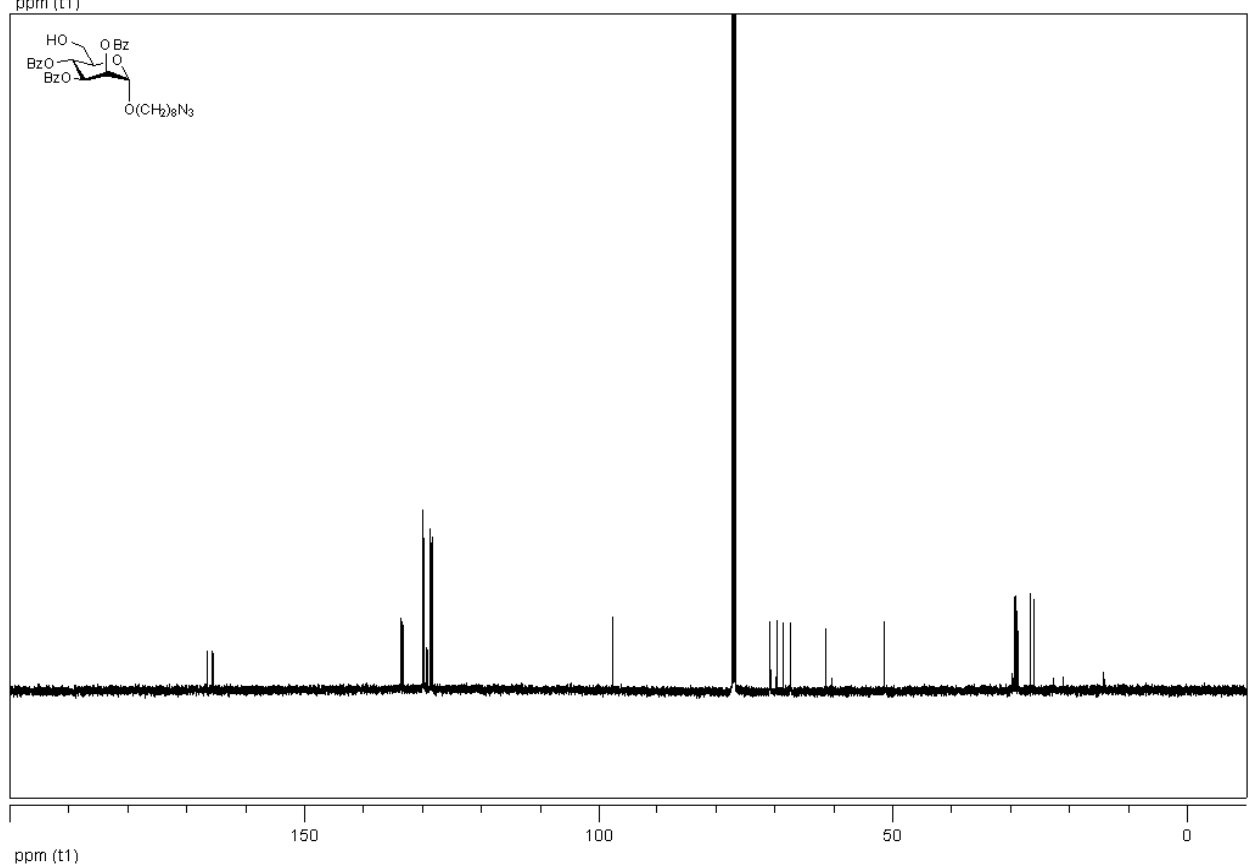

### 3,4,6-Tri-*O*-benzoyl-1,2-*O*-(*S*)-benzylidene- $\beta$ -D-mannopyranose (18)

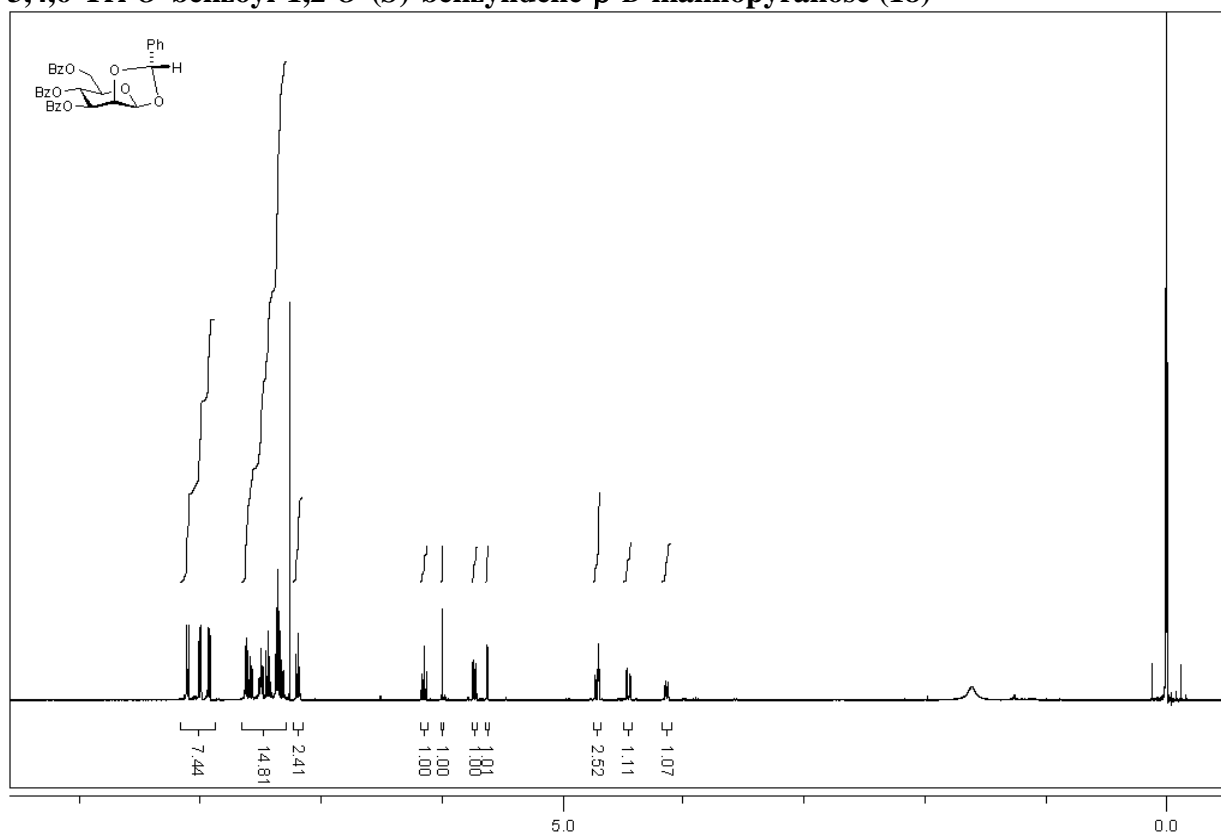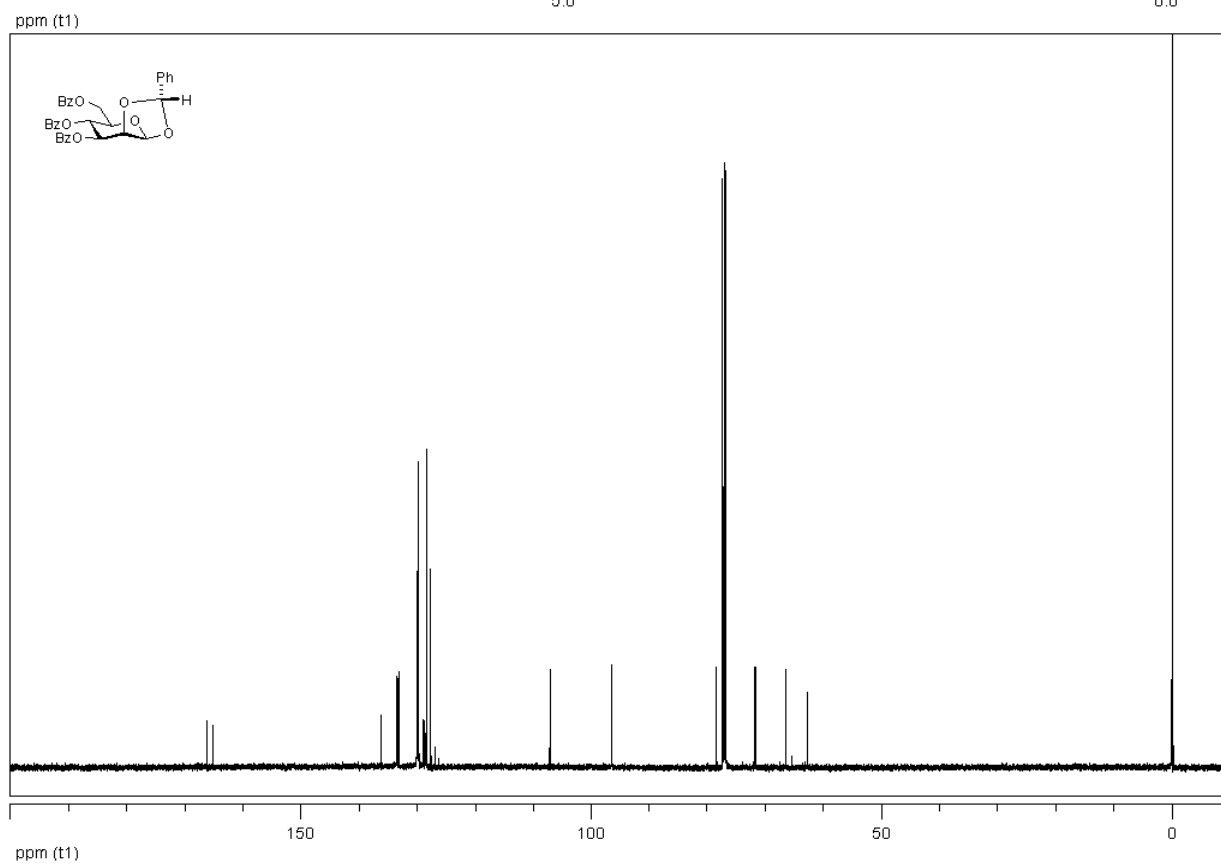



### 4-Methylphenyl 2-O-acetyl-3,4,6-tri-O-benzoyl-1-thio- $\alpha$ -D-mannopyranoside (17)

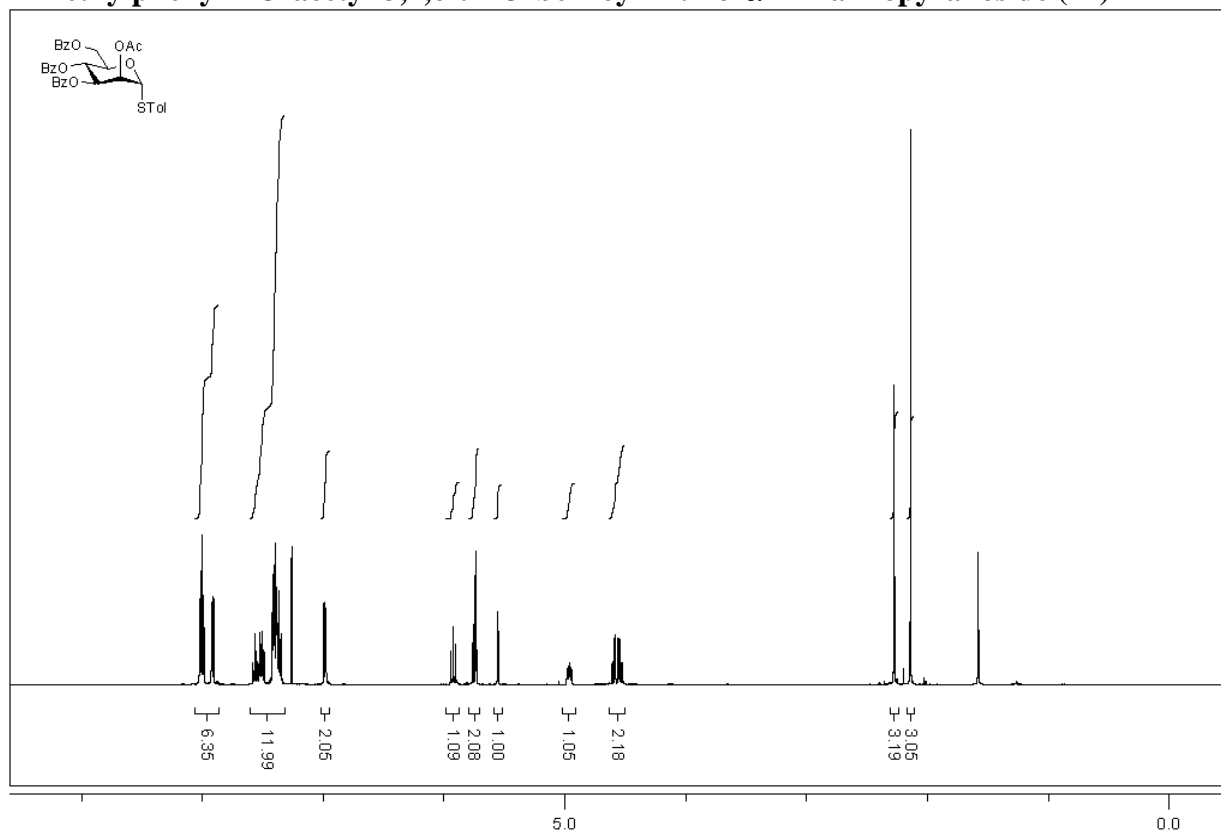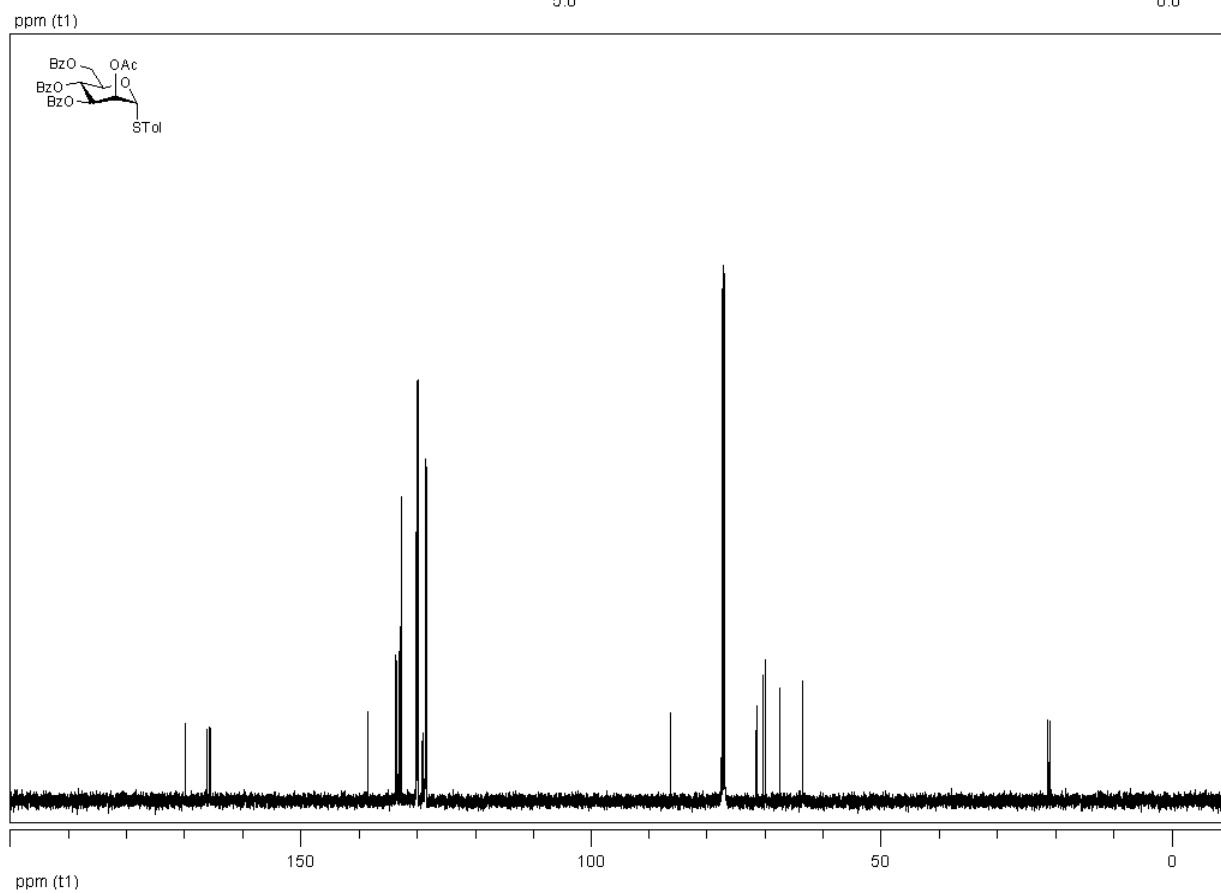

### 8-Azidooctyl 3,4-di-O-(2,3-dimethoxybutane-2,3-diyl)- $\alpha$ -D-mannopyranoside (15)

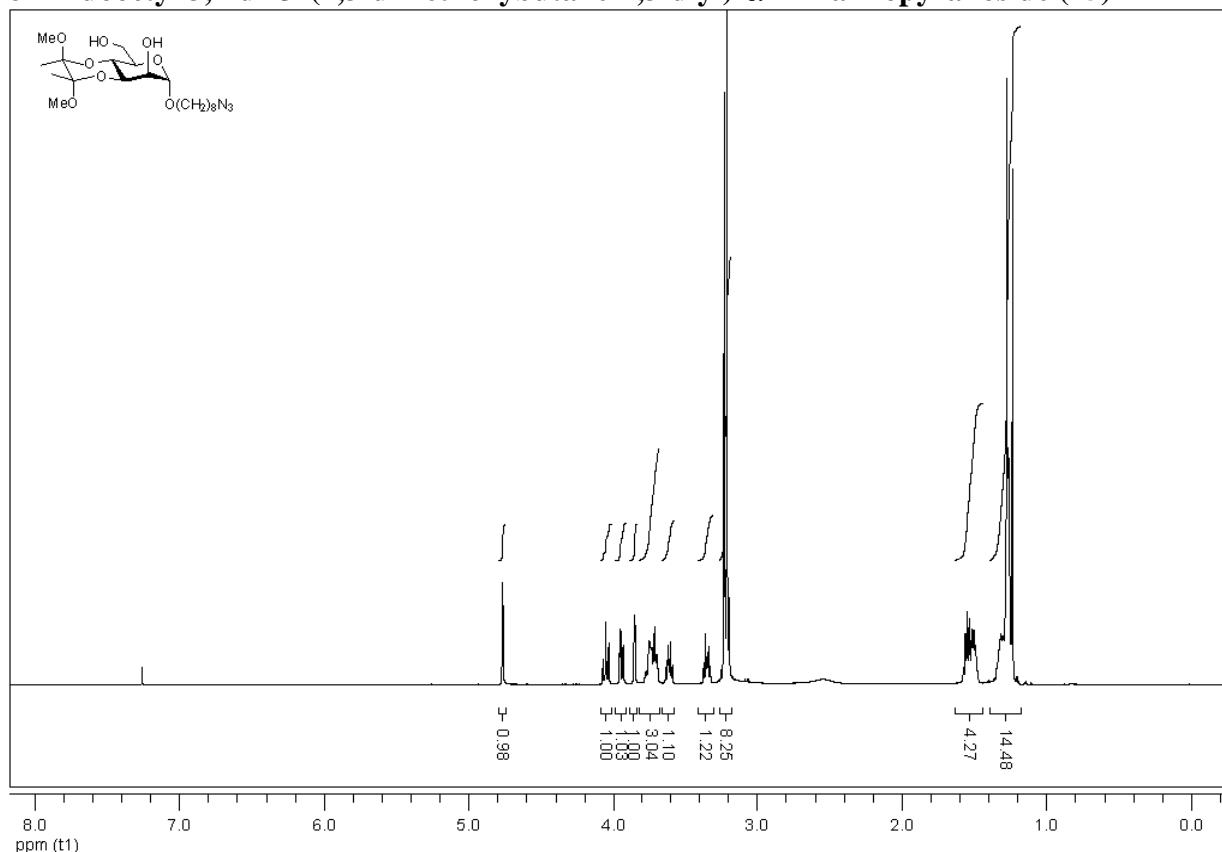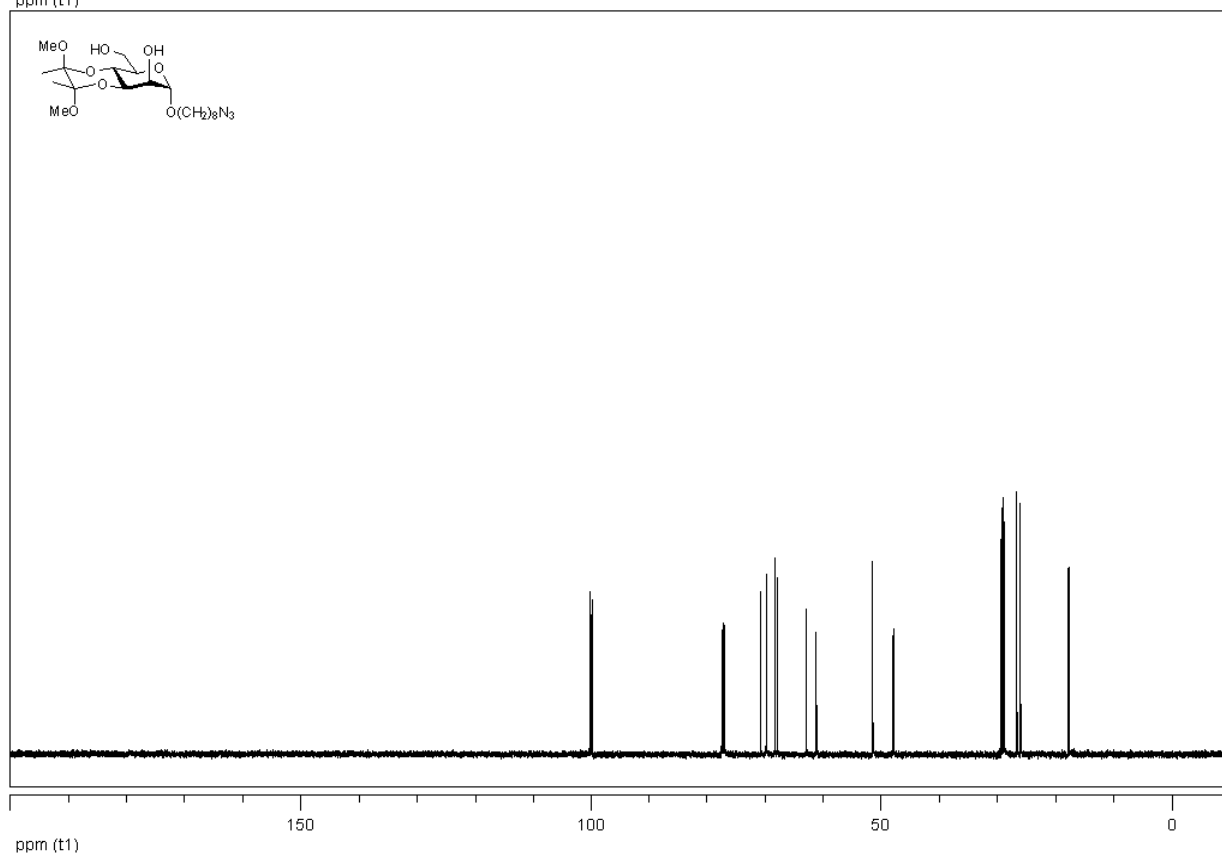

**8-Azidooctyl (2,3,4,6-tetra-*O*-benzoyl- $\alpha$ -D-mannopyranosyl)-(1 $\rightarrow$ 6)-2,3,4-tri-*O*-benzoyl- $\alpha$ -D-mannopyranoside (20)**

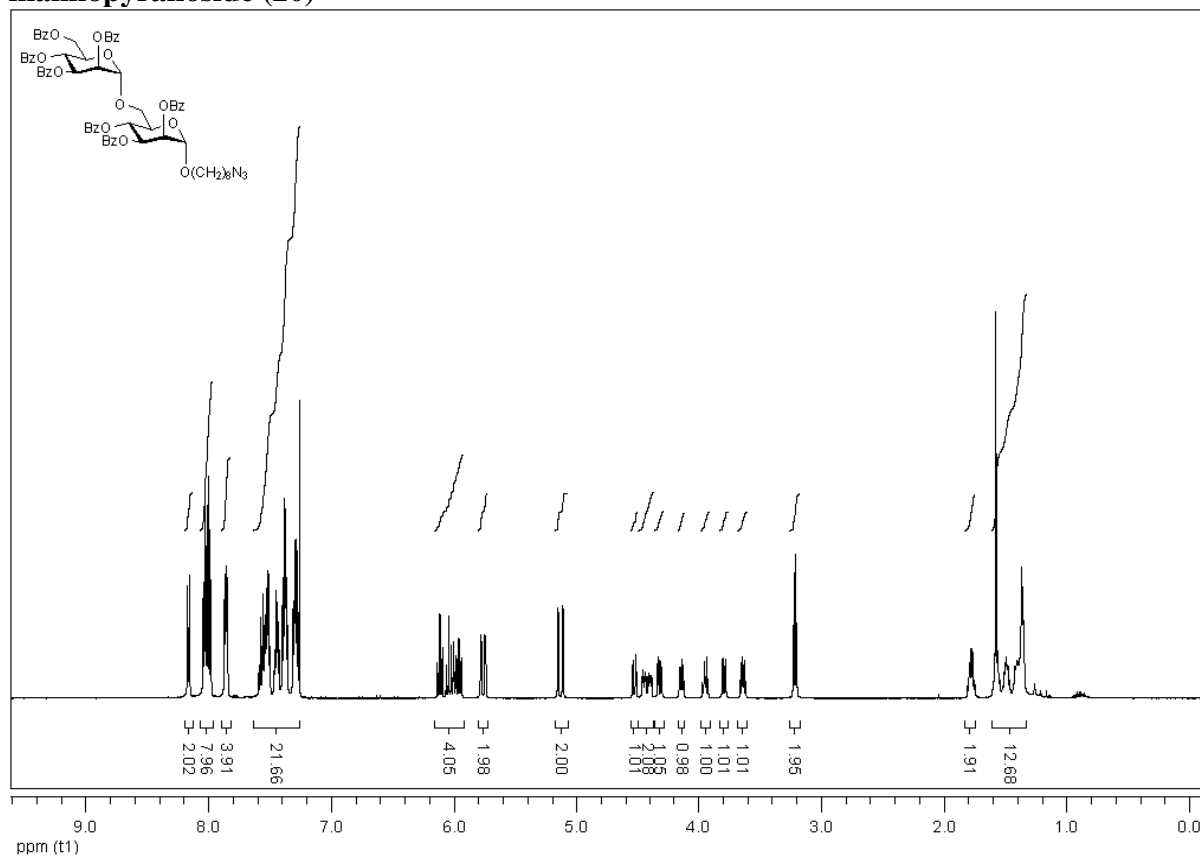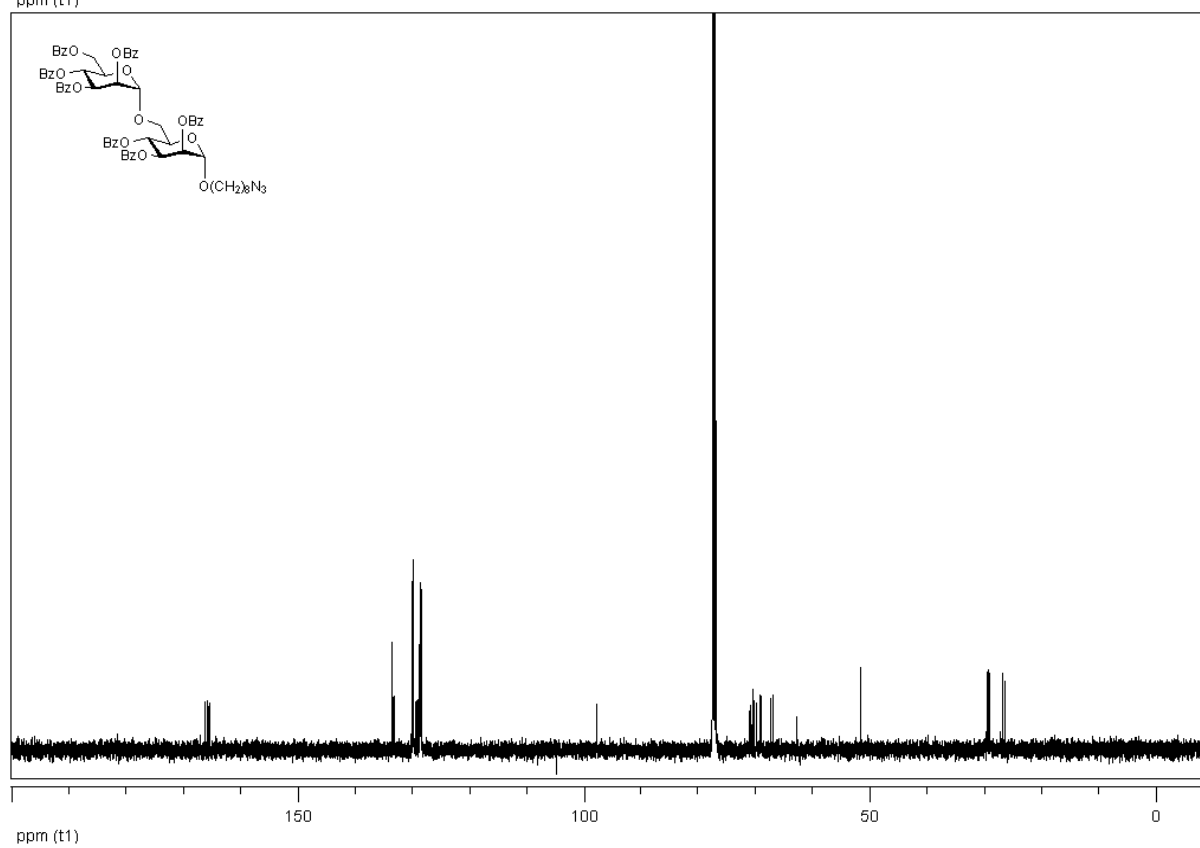

### 8-Azidoethyl ( $\alpha$ -D-mannopyranosyl)-(1 $\rightarrow$ 6)- $\alpha$ -D-mannopyranoside (1)

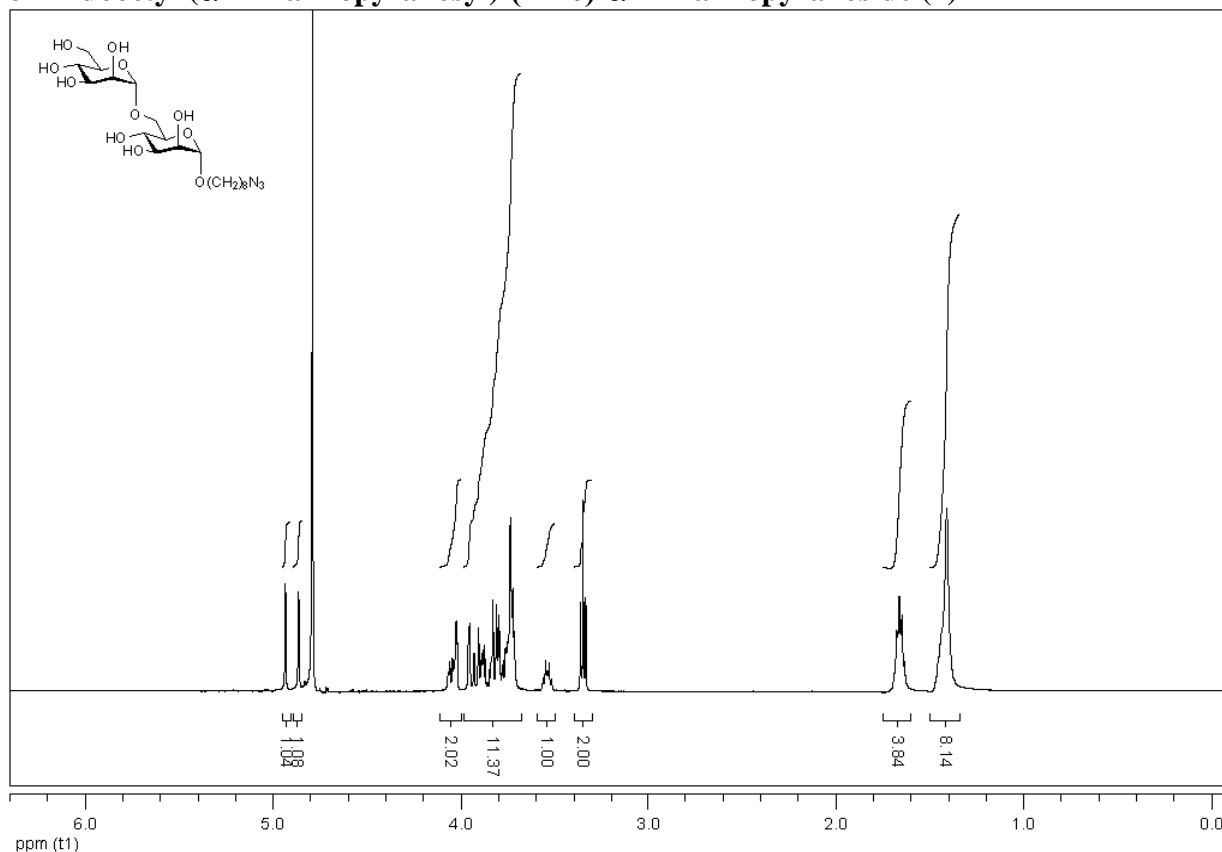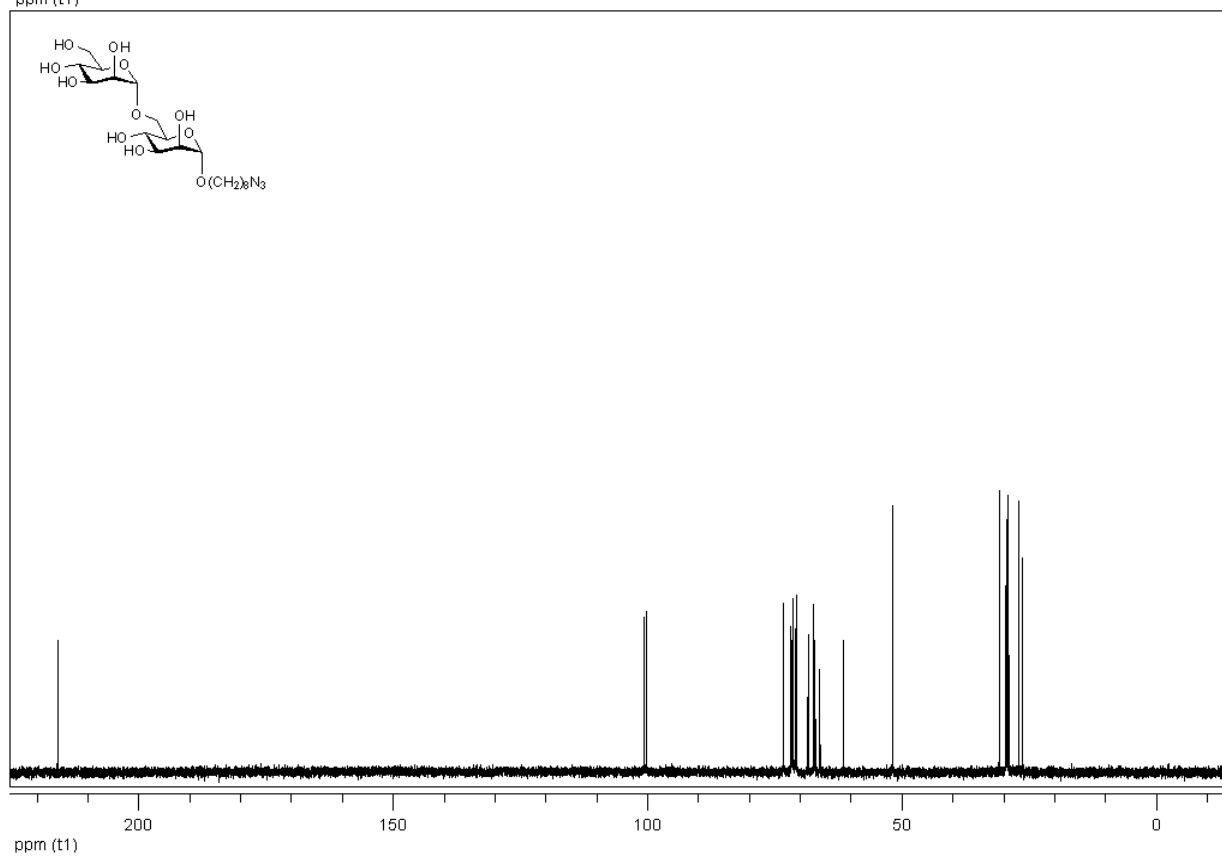

**8-Azidoctyl (2,3,4-tri-*O*-benzoyl-6-*O*-(*tert*-butyldiphenylsilyl)- $\alpha$ -D-mannopyranosyl)-(1 $\rightarrow$ 6)-2,3,4-tri-*O*-benzoyl- $\alpha$ -D-mannopyranoside (23)**

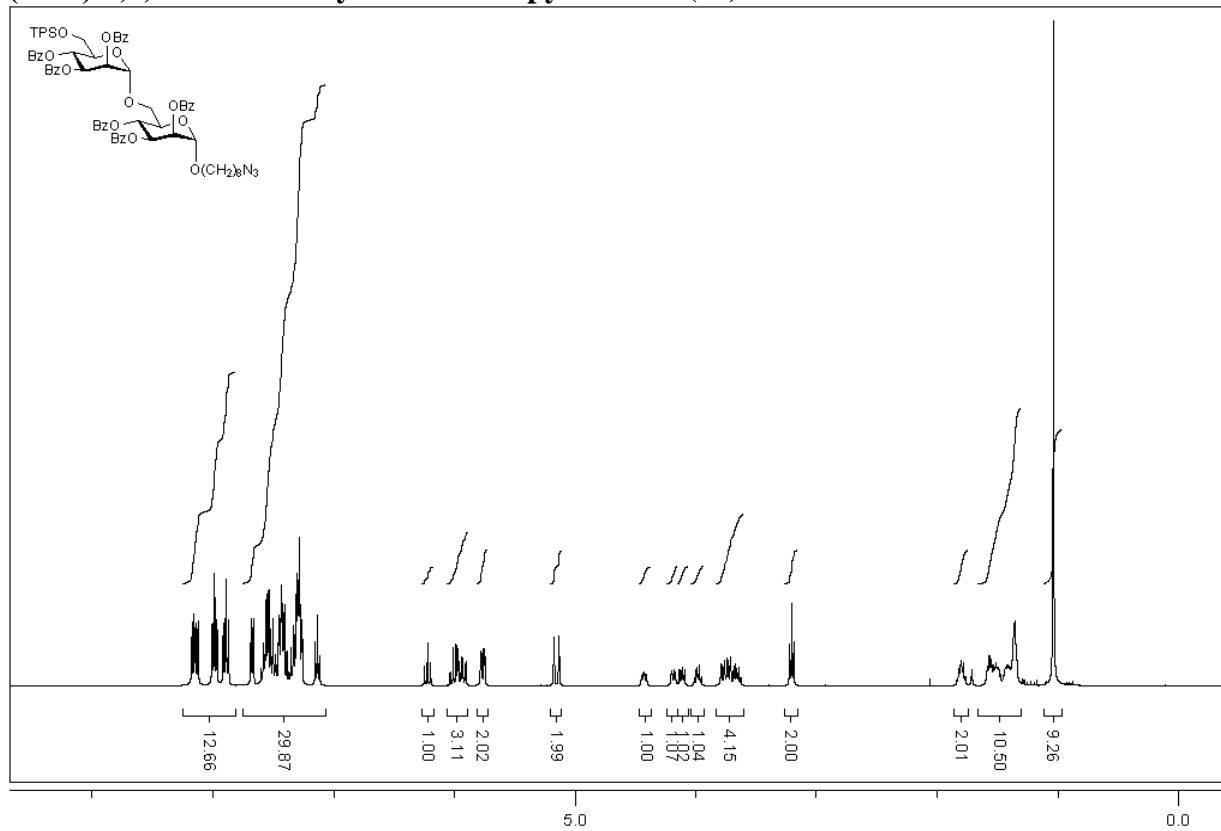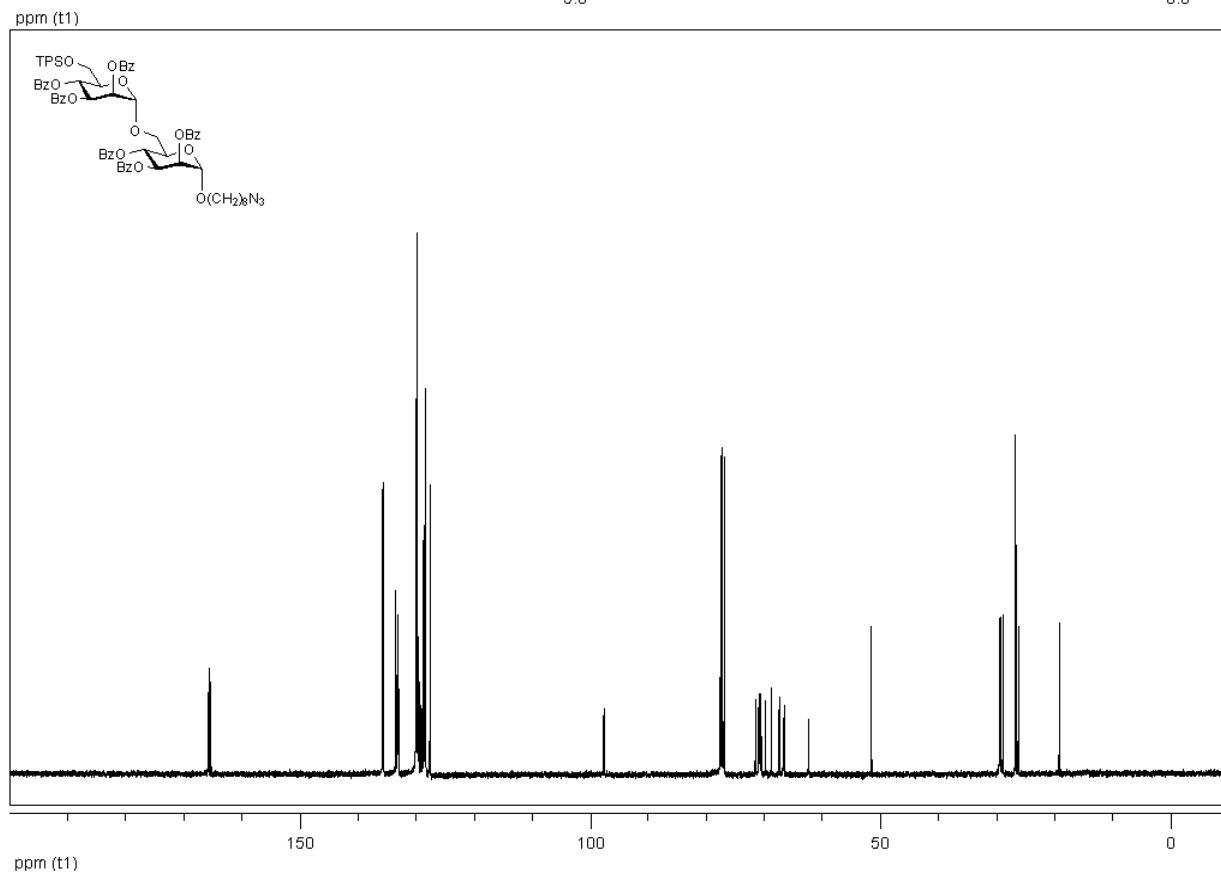

**8-Azidooctyl (2,3,4-tri-*O*-benzoyl- $\alpha$ -D-mannopyranosyl)-(1 $\rightarrow$ 6)-2,3,4-tri-*O*-benzoyl- $\alpha$ -D-mannopyranoside (24)**

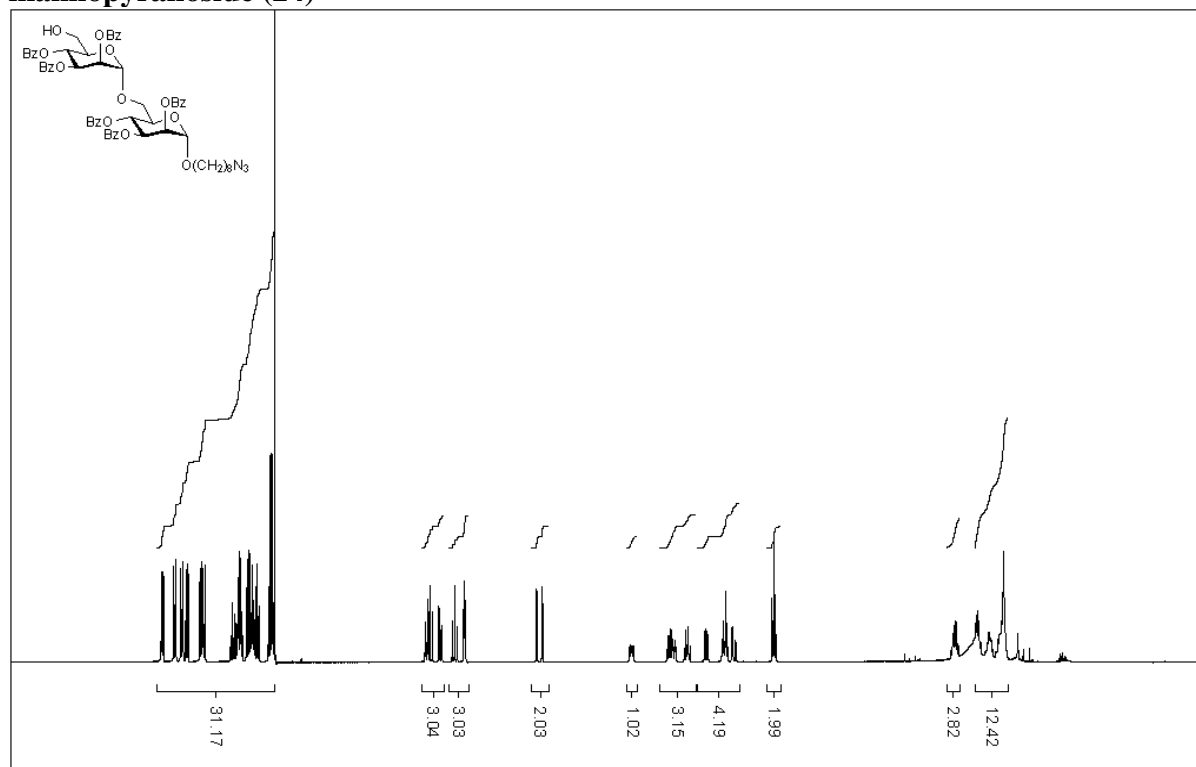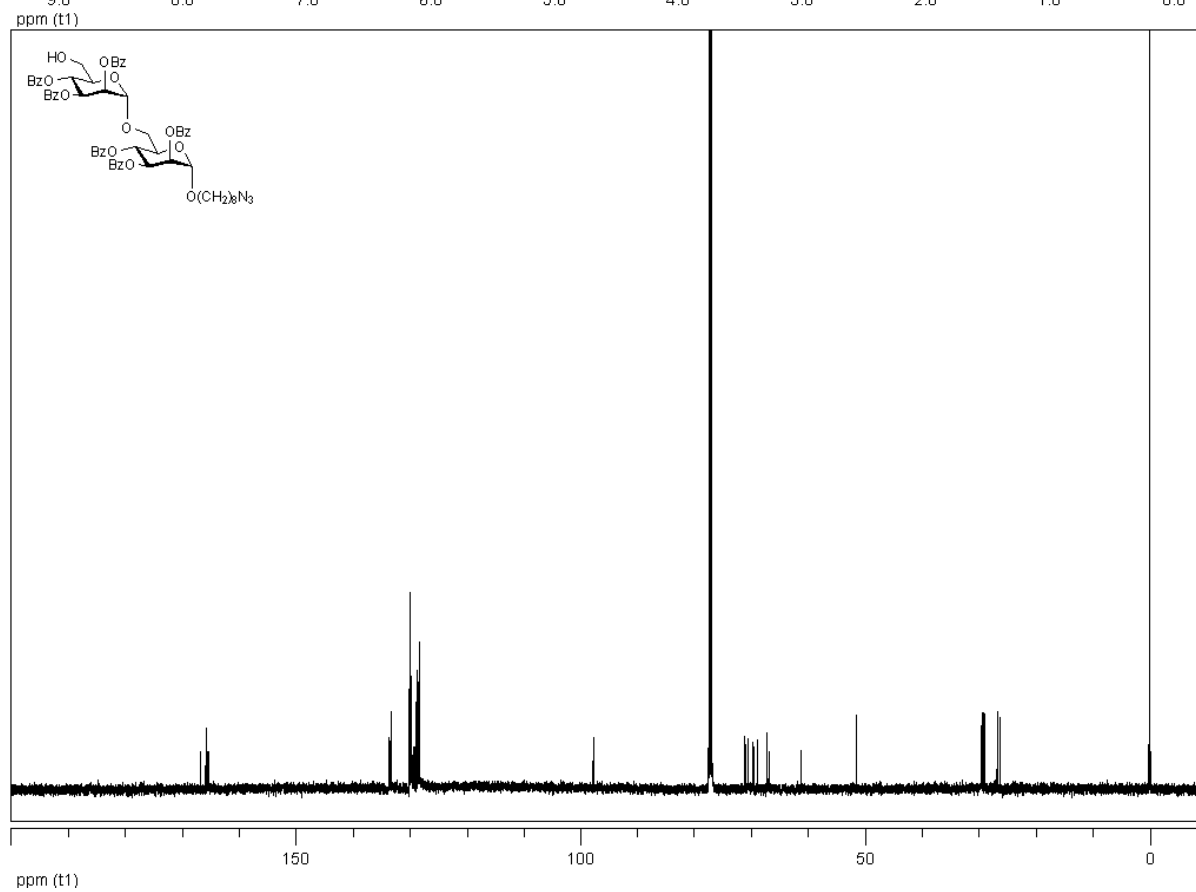

**8-Azido-octyl (2,3,4,6-tetra-O-benzoyl- $\alpha$ -D-mannopyranosyl)-(1 $\rightarrow$ 6)-(2,3,4-tri-O-benzoyl- $\alpha$ -D-mannopyranosyl)-(1 $\rightarrow$ 6)-2,3,4-tri-O-benzoyl- $\alpha$ -D-mannopyranoside (25)**

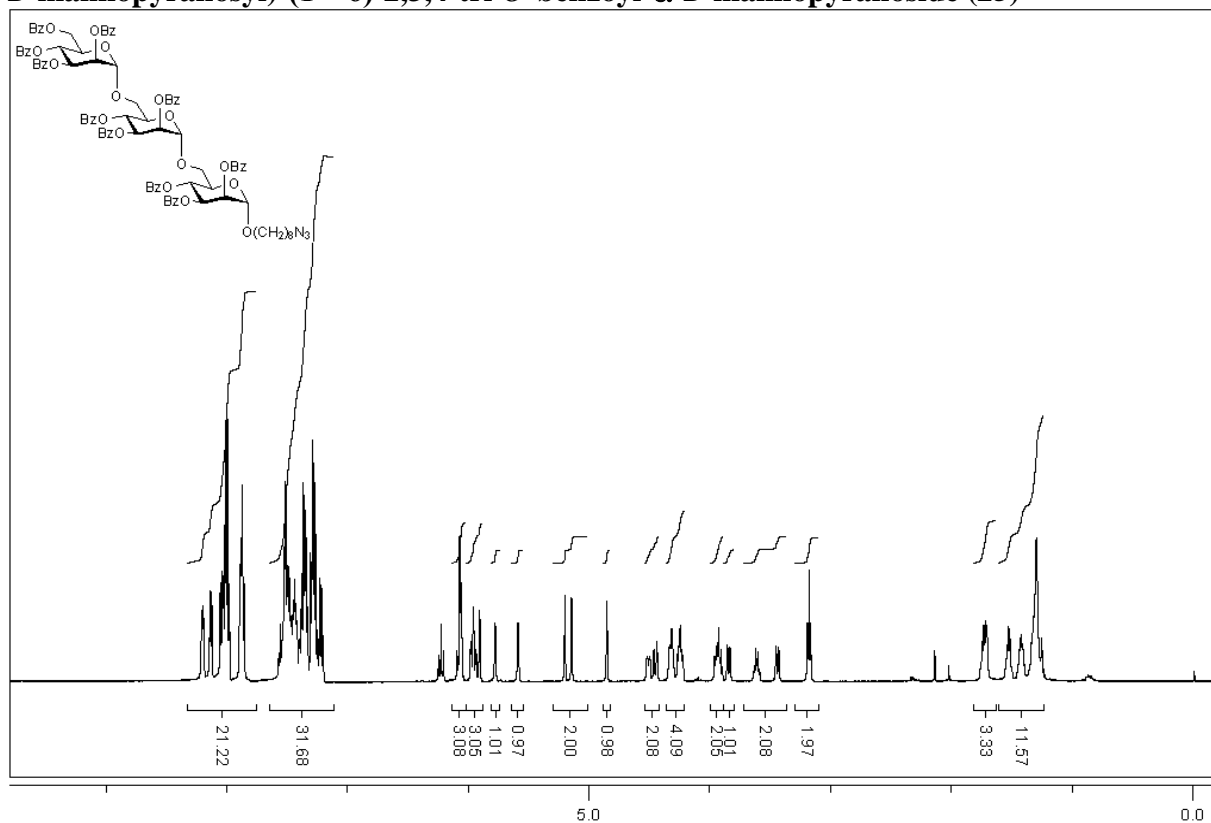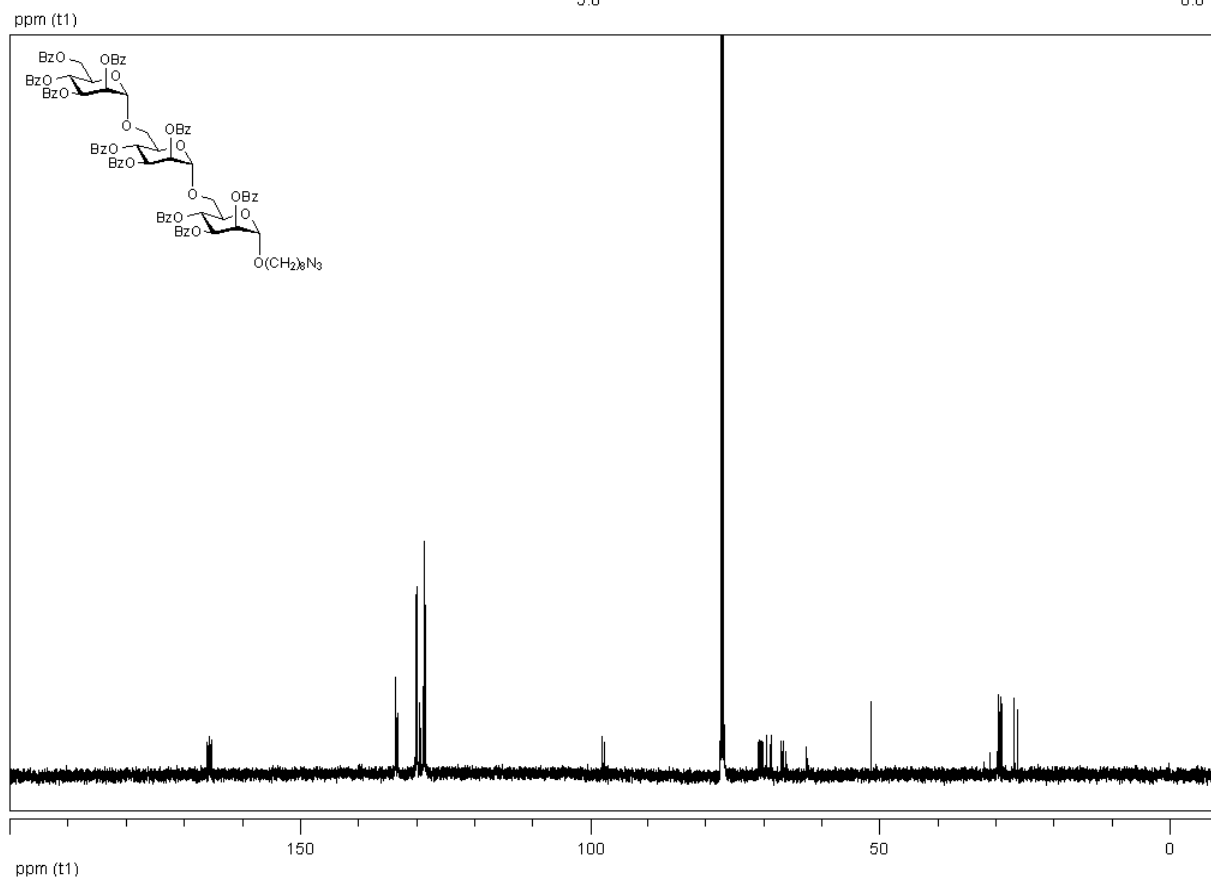

**8-Azidoethyl ( $\alpha$ -D-mannopyranosyl)-(1 $\rightarrow$ 6)-( $\alpha$ -D-mannopyranosyl)-(1 $\rightarrow$ 6)- $\alpha$ -D-mannopyranoside (2)**

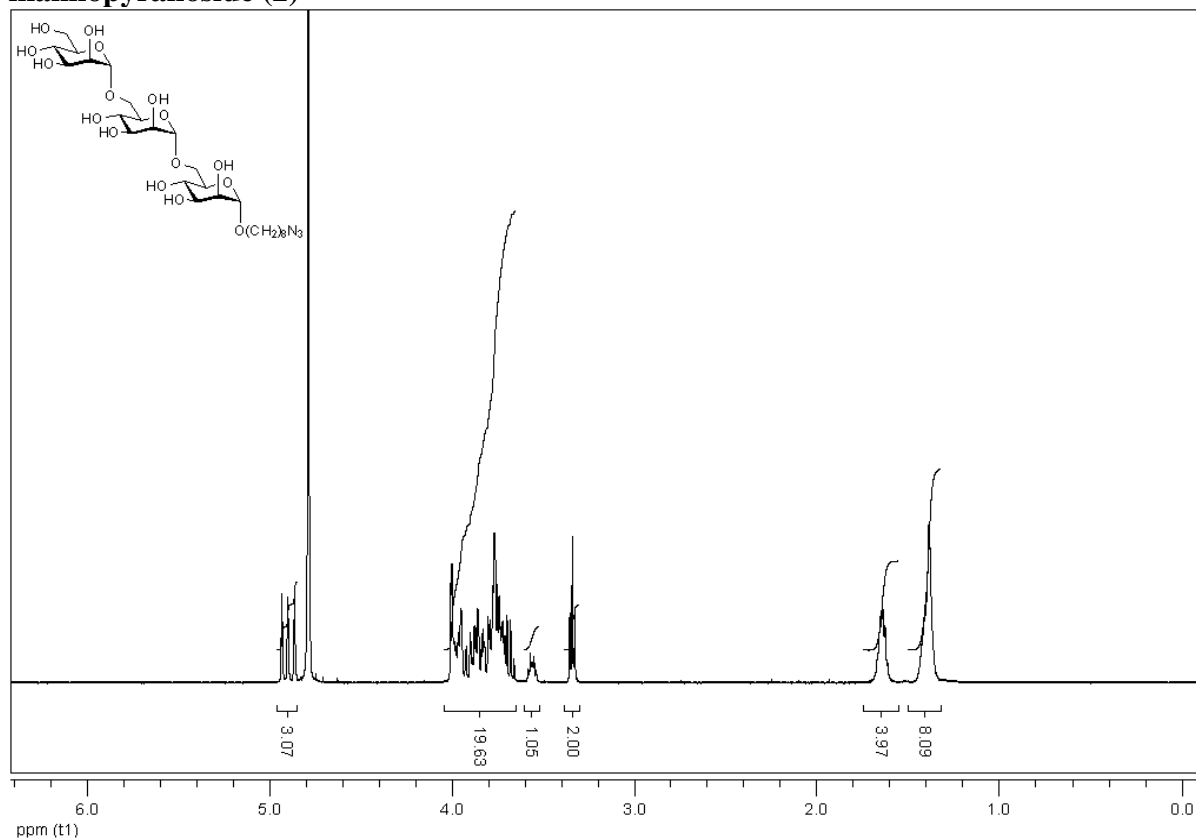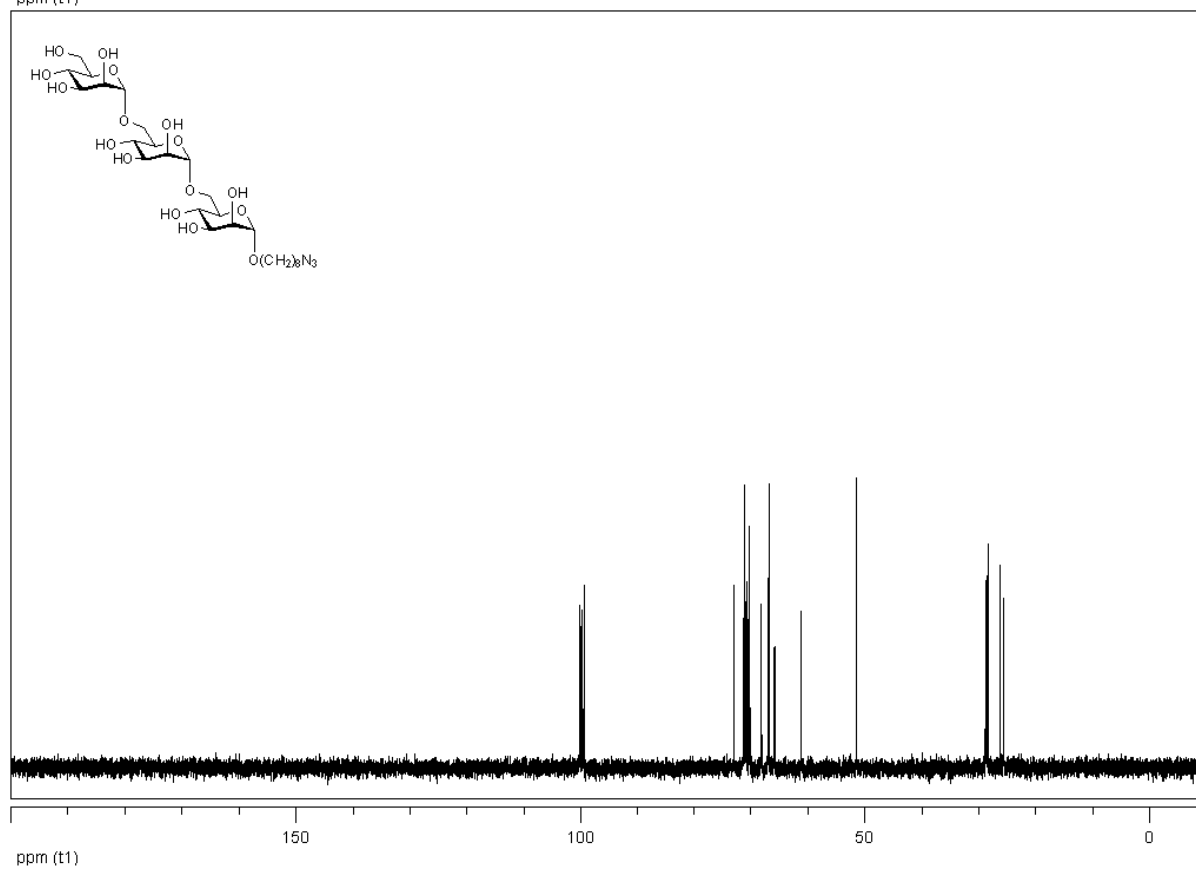



**8-Azidooctyl (2-*O*-acetyl-3,4,6-tri-*O*-benzoyl- $\alpha$ -D-mannopyranosyl)-(1 $\rightarrow$ 6)-2,3,4-tri-*O*-benzoyl- $\alpha$ -D-mannopyranoside (26)**

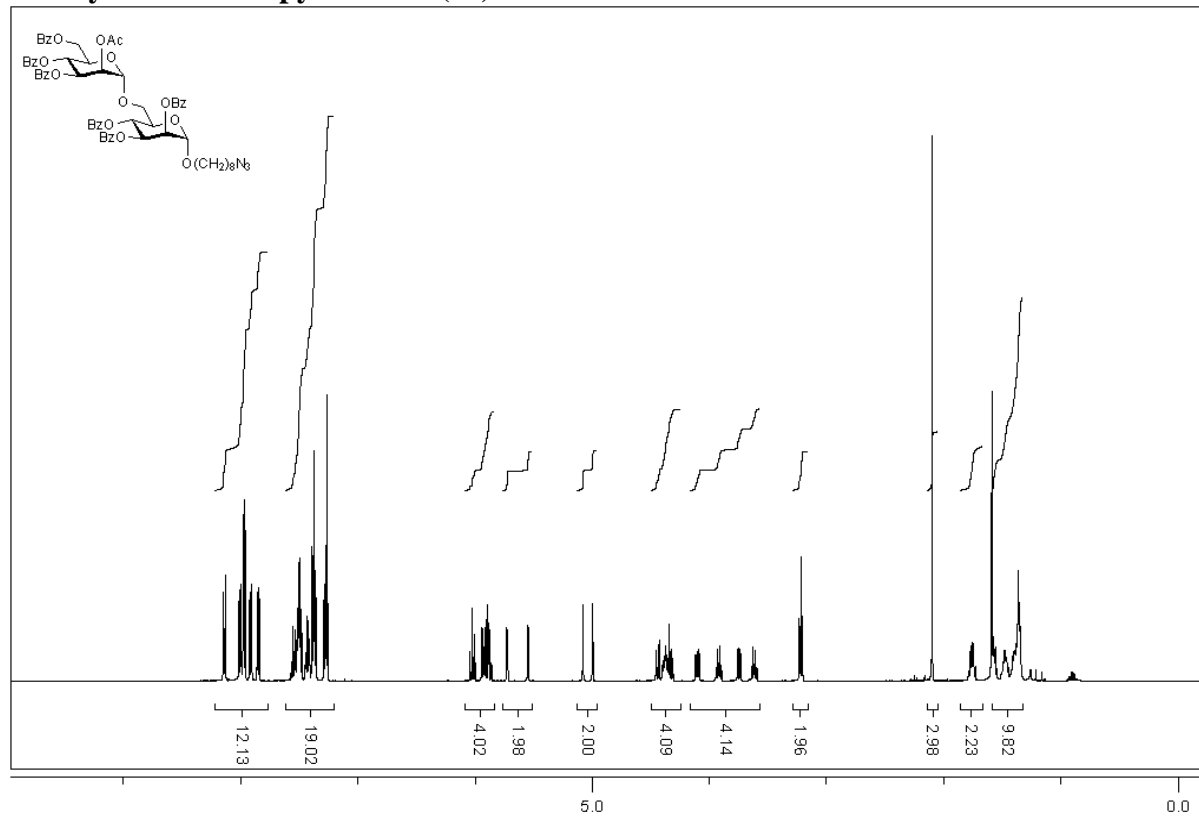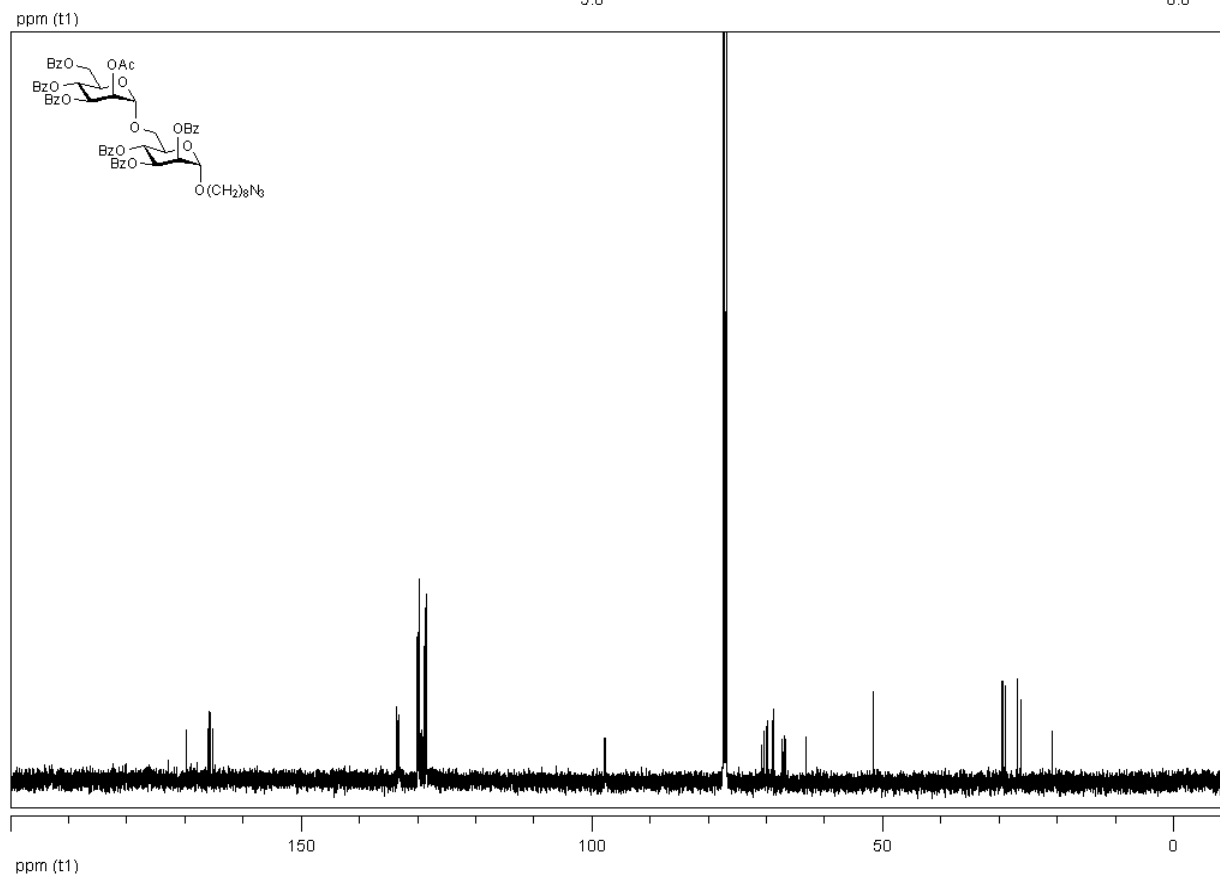

**8-Azidooctyl (3,4,6-tri-*O*-benzoyl- $\alpha$ -D-mannopyranosyl)-(1 $\rightarrow$ 6)-2,3,4-tri-*O*-benzoyl- $\alpha$ -D-mannopyranoside (27)**

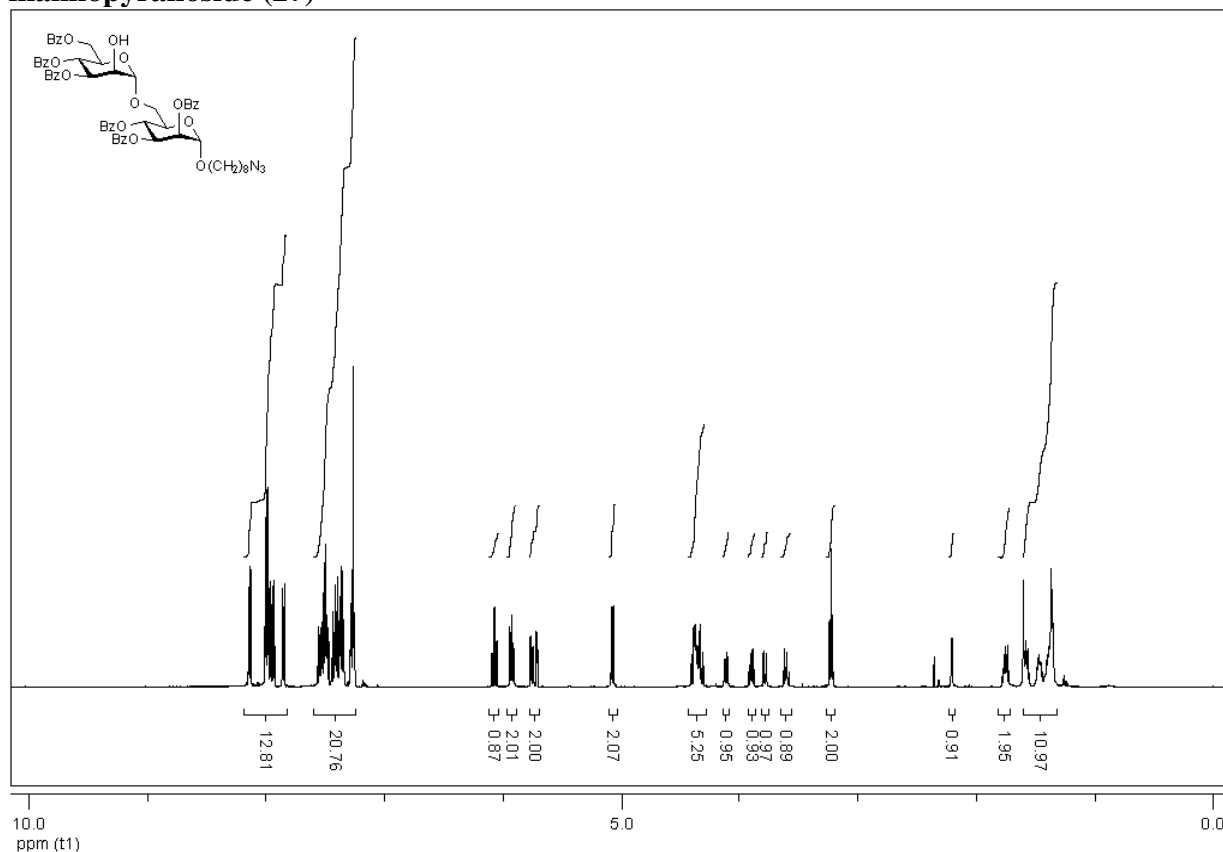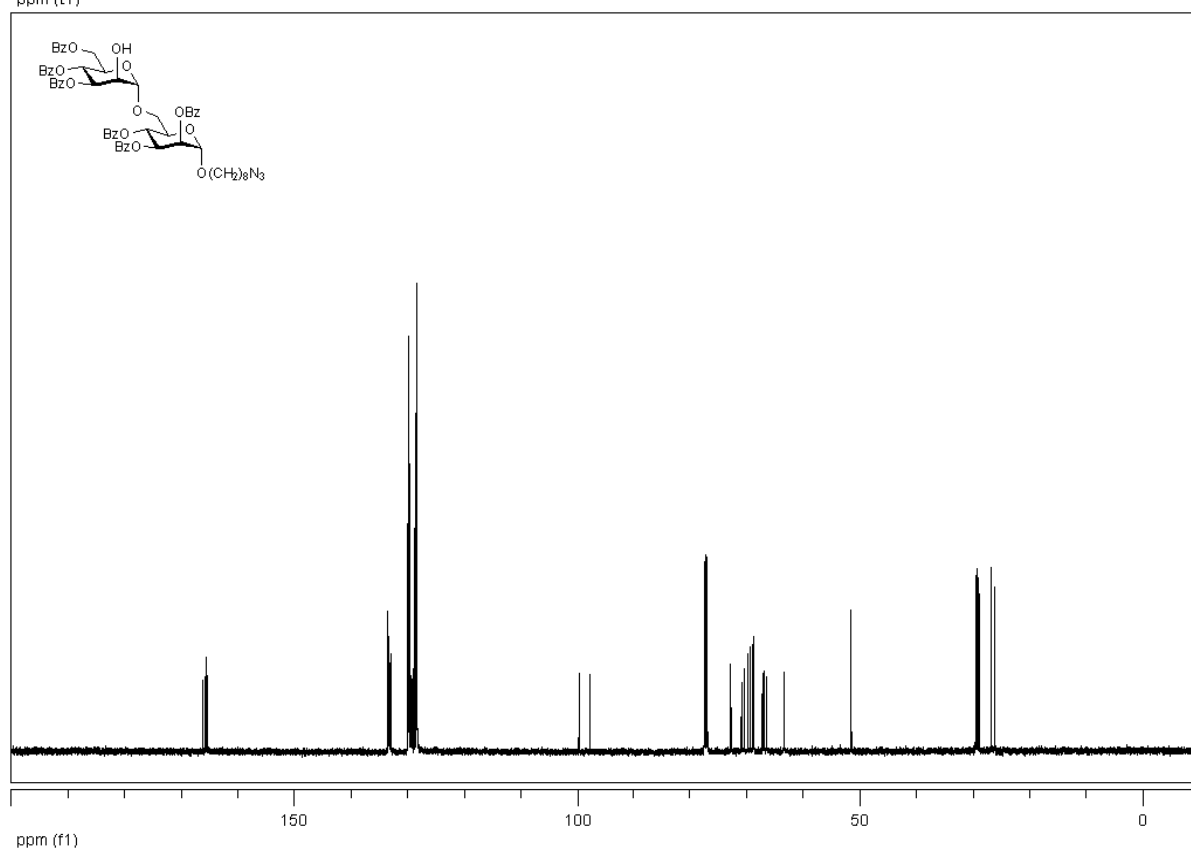

**8-Azidooctyl (2,3,4-tri-*O*-benzoyl- $\alpha$ -D-mannopyranosyl)-(1 $\rightarrow$ 2)-(3,4,6-tri-*O*-benzoyl- $\alpha$ -D-mannopyranosyl)-(1 $\rightarrow$ 6)-2,3,4,6-tetra-*O*-benzoyl- $\alpha$ -D-mannopyranoside (28)**

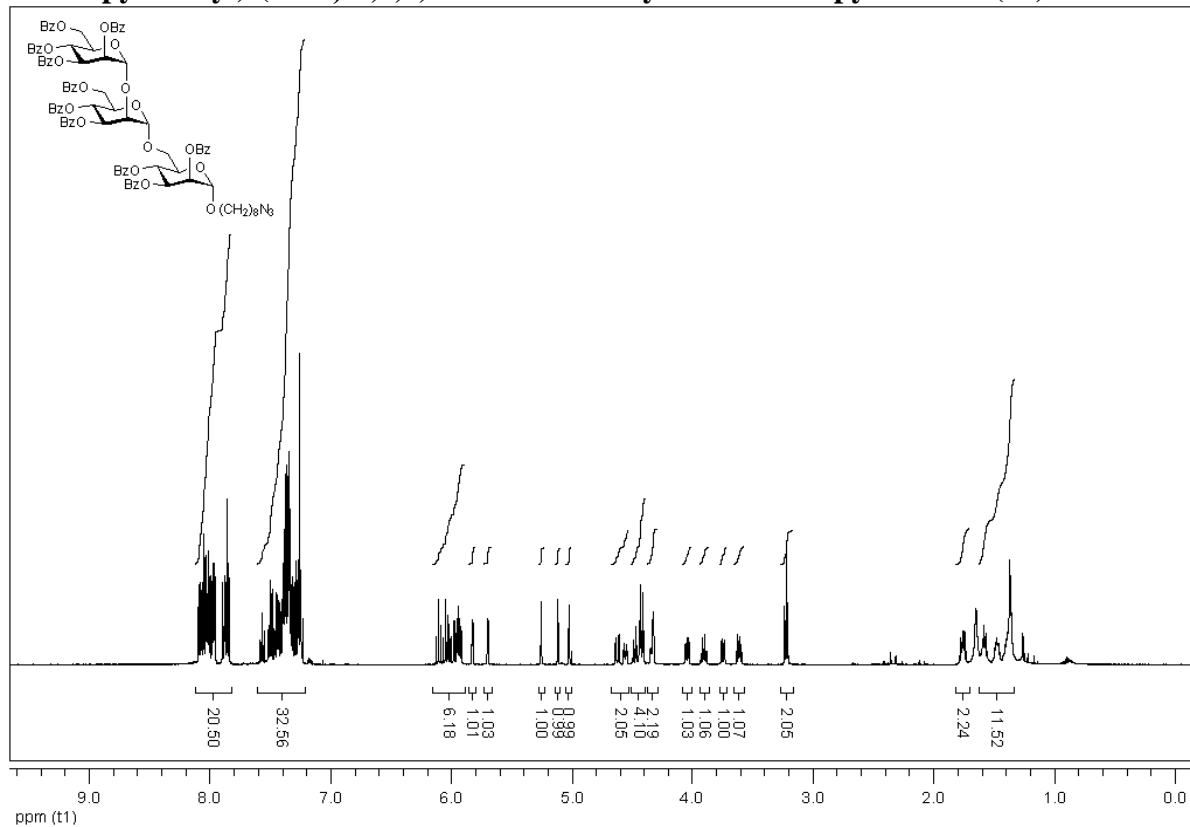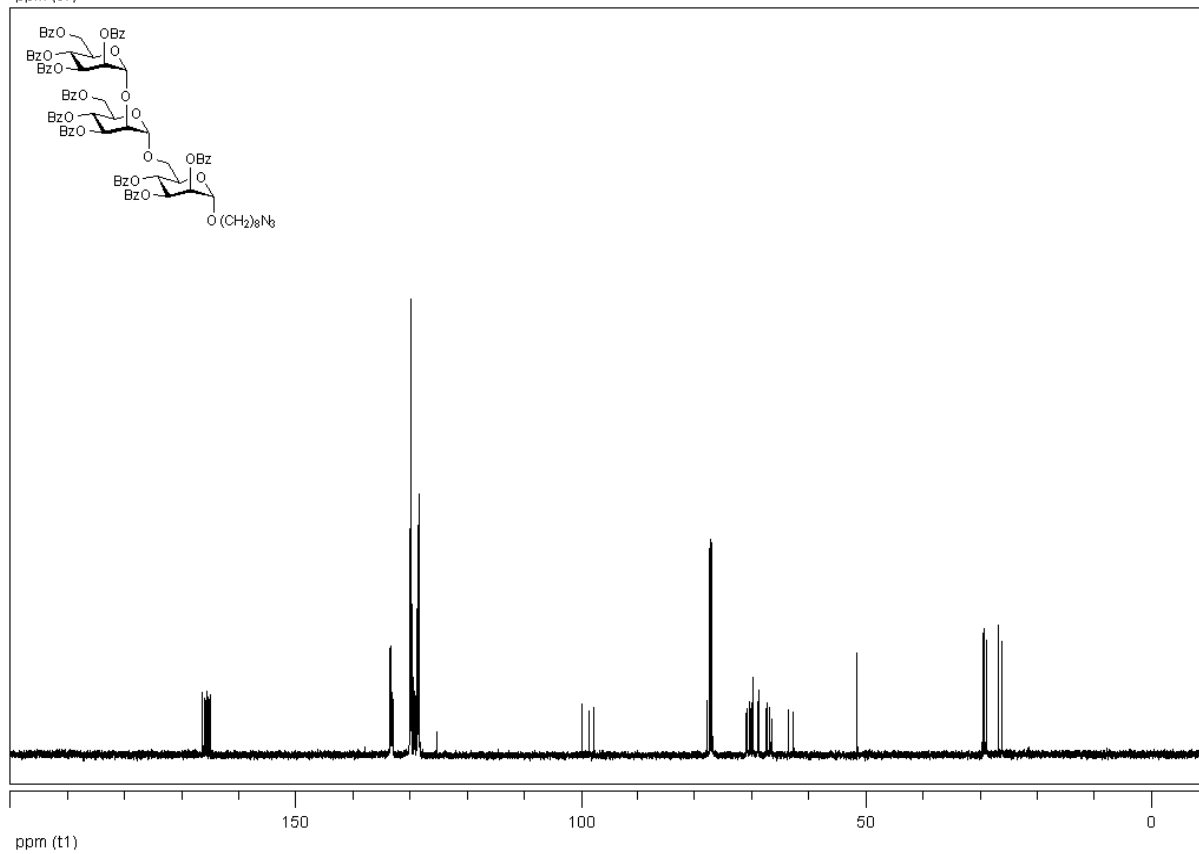

**8-Azidooctyl ( $\alpha$ -D-mannopyranosyl)-(1 $\rightarrow$ 2)-( $\alpha$ -D-mannopyranosyl)-(1 $\rightarrow$ 6)- $\alpha$ -D-mannopyranoside (3)**

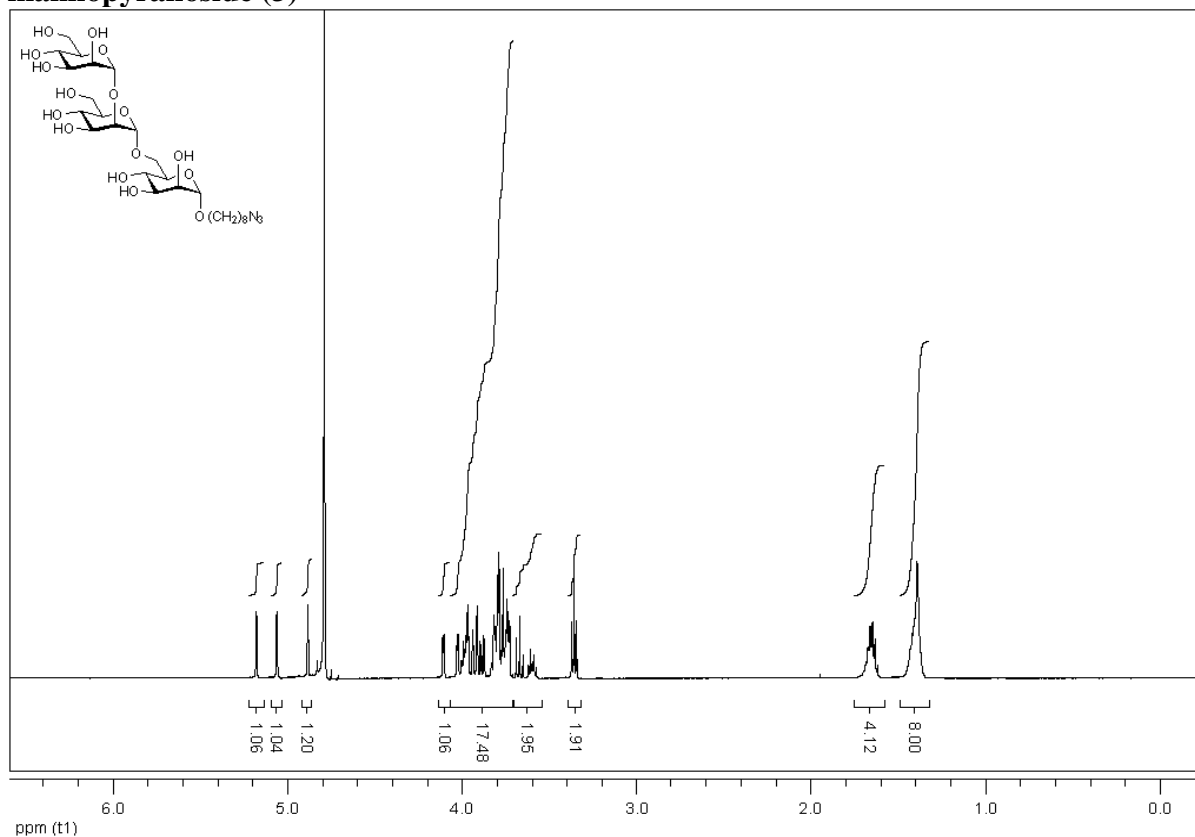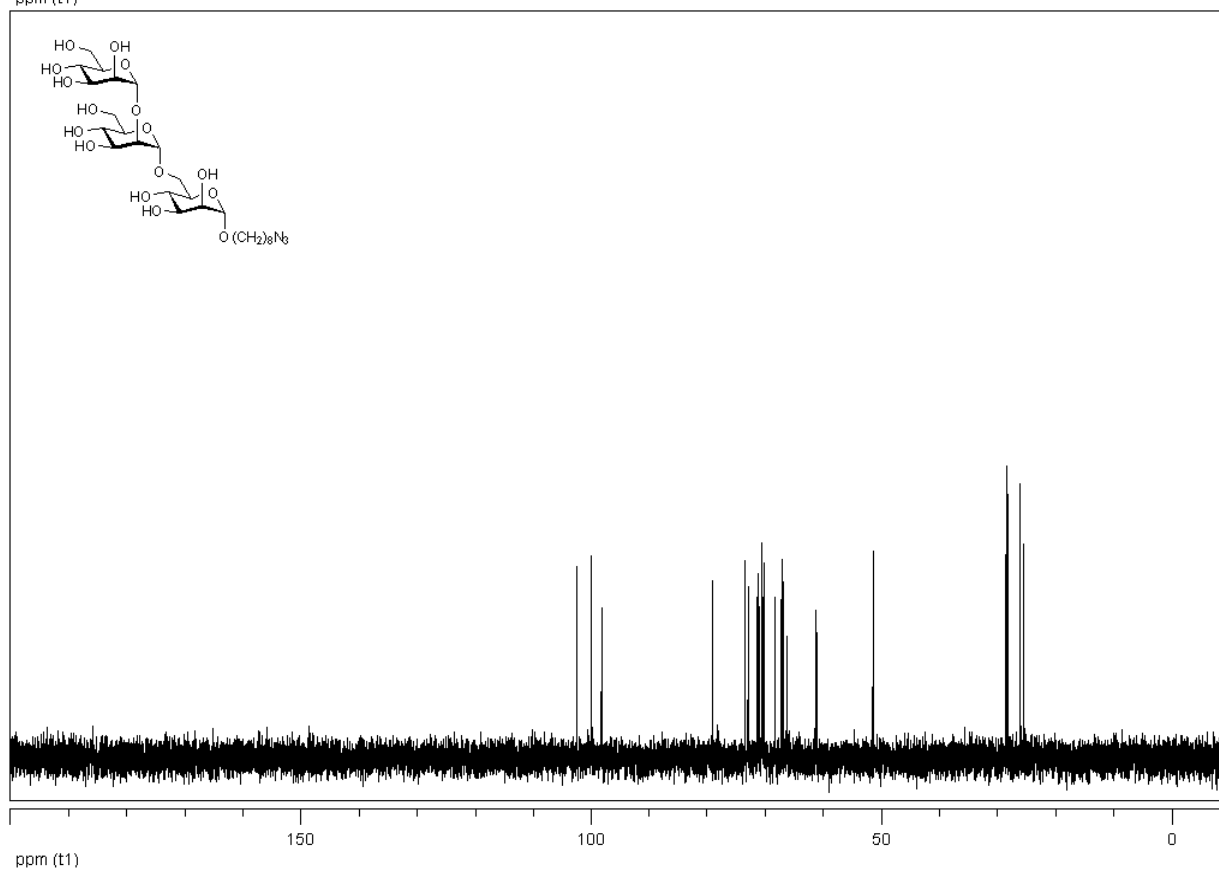

**Azidoethyl 2,6-di-O-(2,3,4,6-tetra-O-benzoyl- $\alpha$ -D-mannopyranosyl)-3,4-di-O-(2,3-dimethoxybutane-2,3-diyl)- $\alpha$ -D-mannopyranoside (29)**

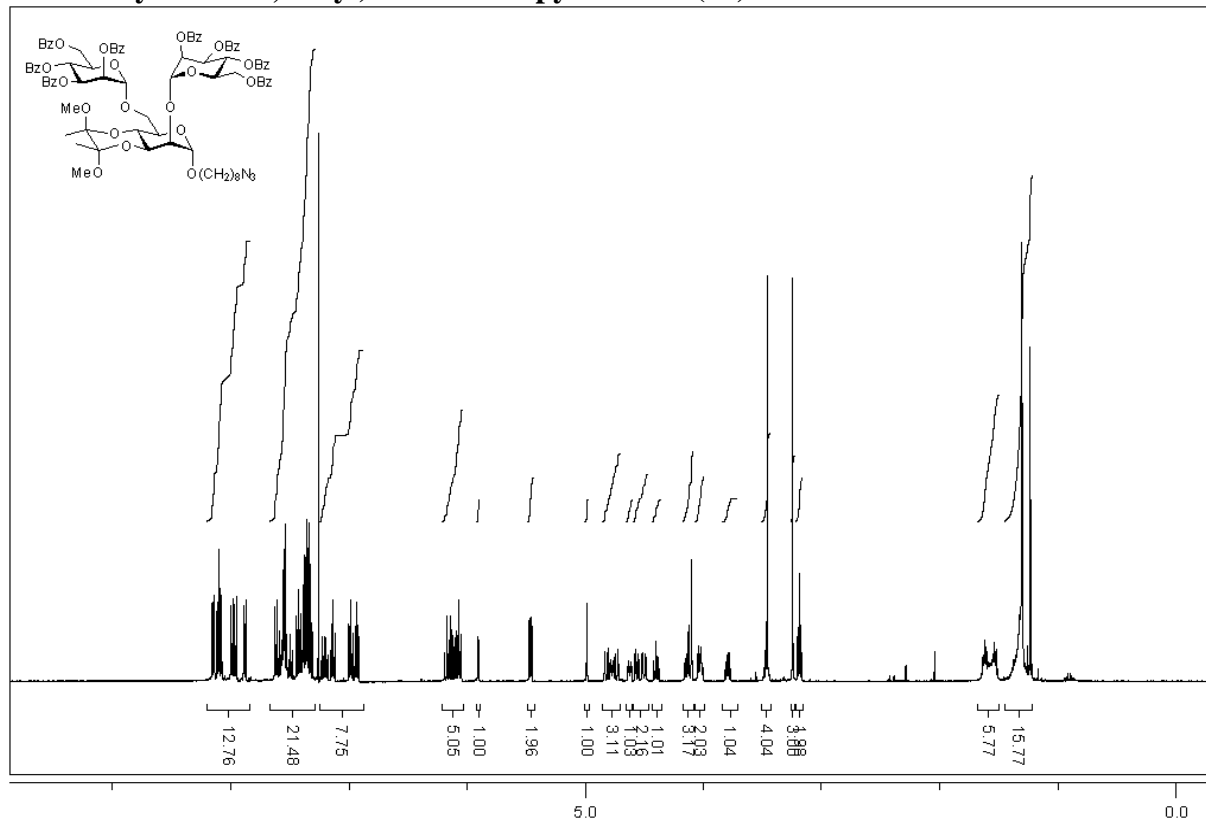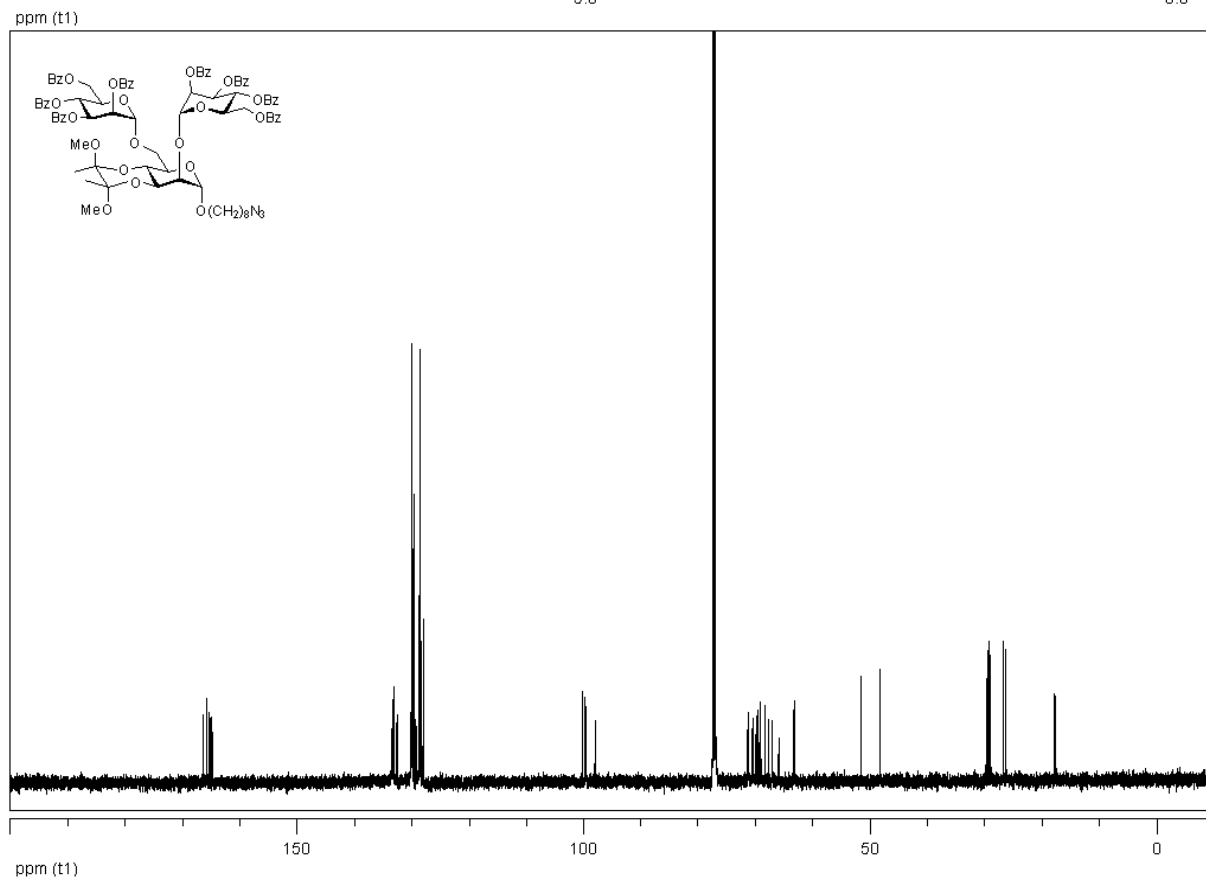

# Azidoethyl 2,6-di-O- $\alpha$ -D-mannopyranosyl- $\alpha$ -D-mannopyranoside (4)

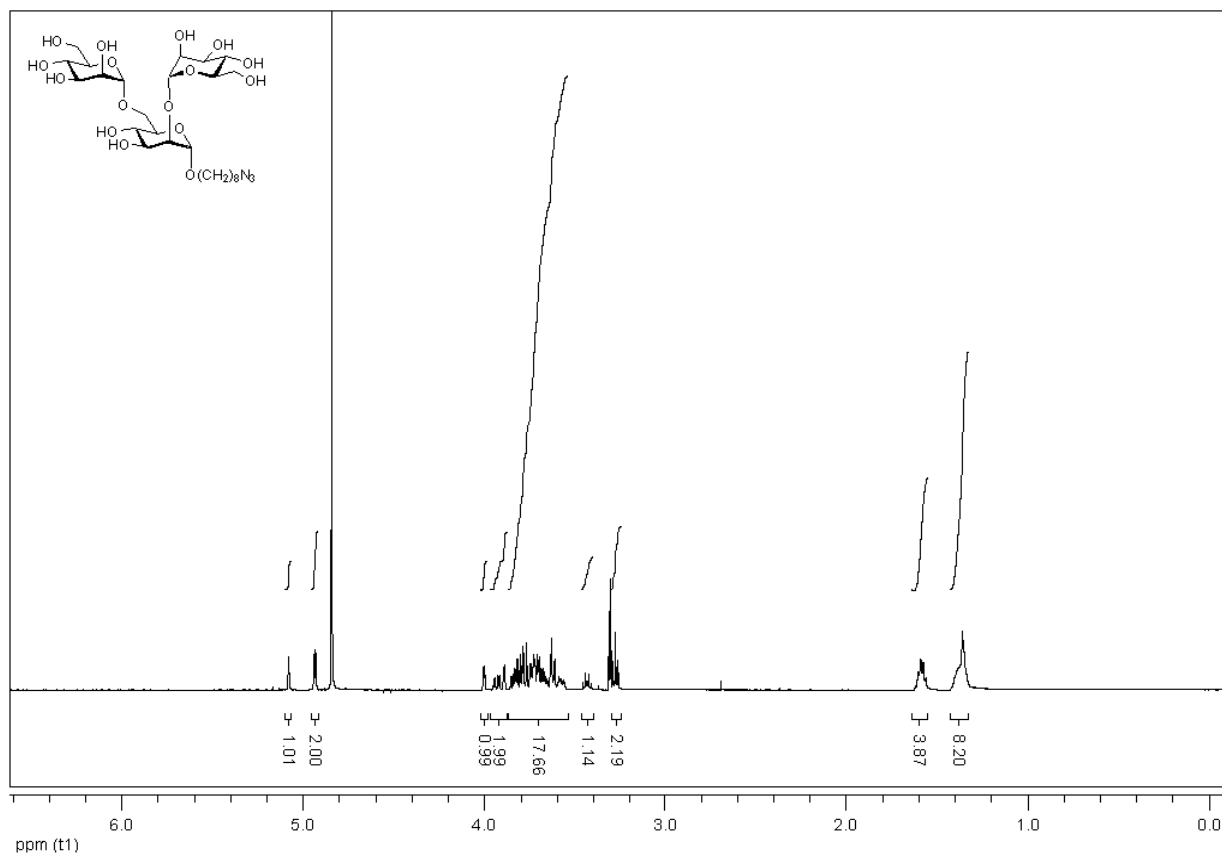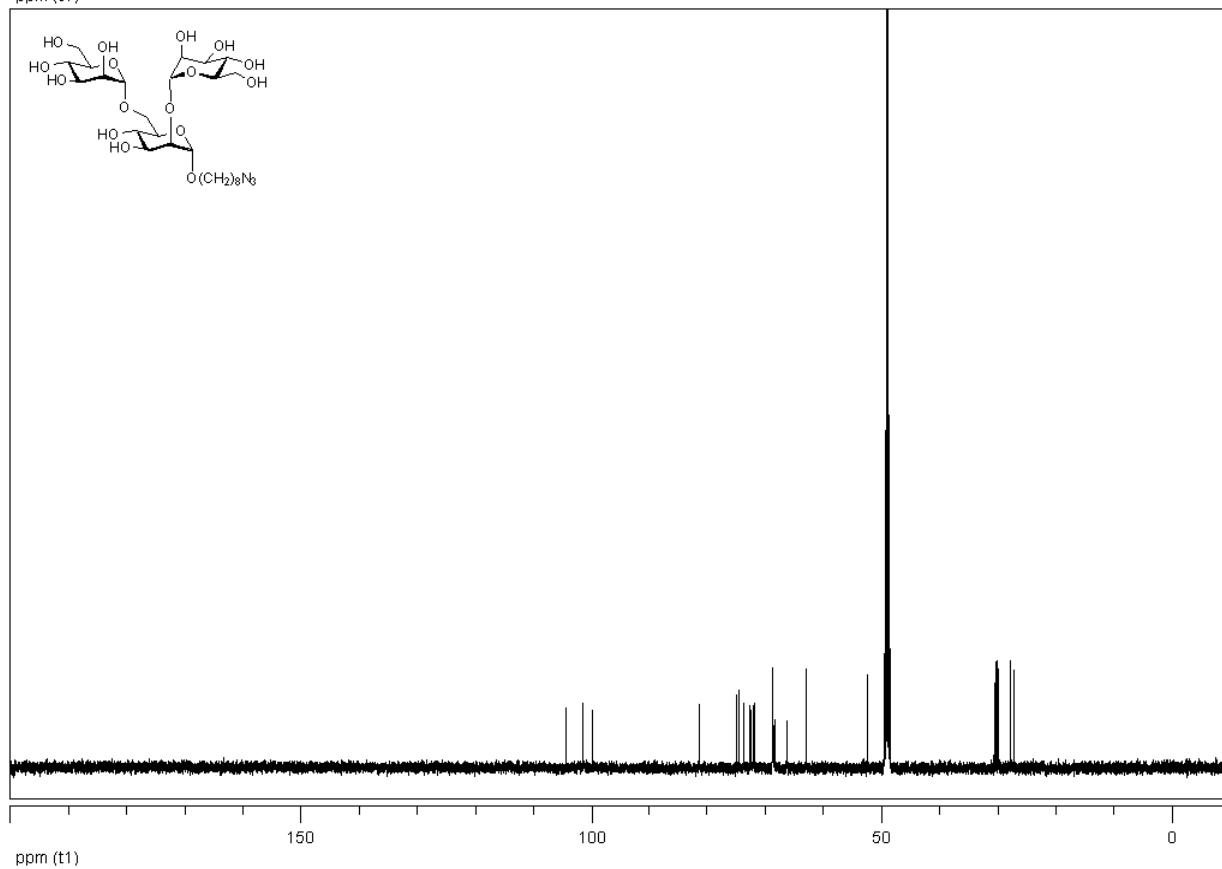

**4-[(7-Nitrobenzofurazan-4-yl)aminomethyl]-triazol-1-yloctyl ( $\alpha$ -D-mannopyranosyl)-(1 $\rightarrow$ 6)- $\alpha$ -D-mannopyranoside (5)**

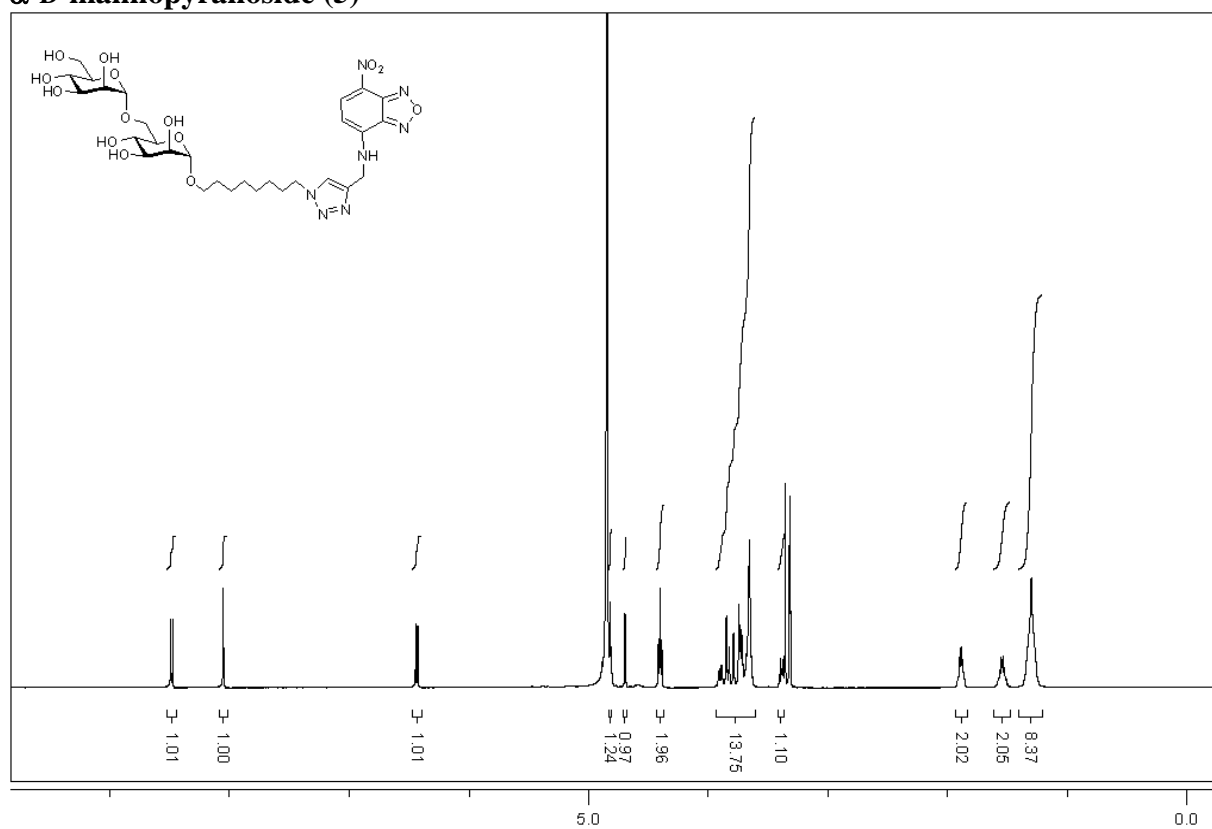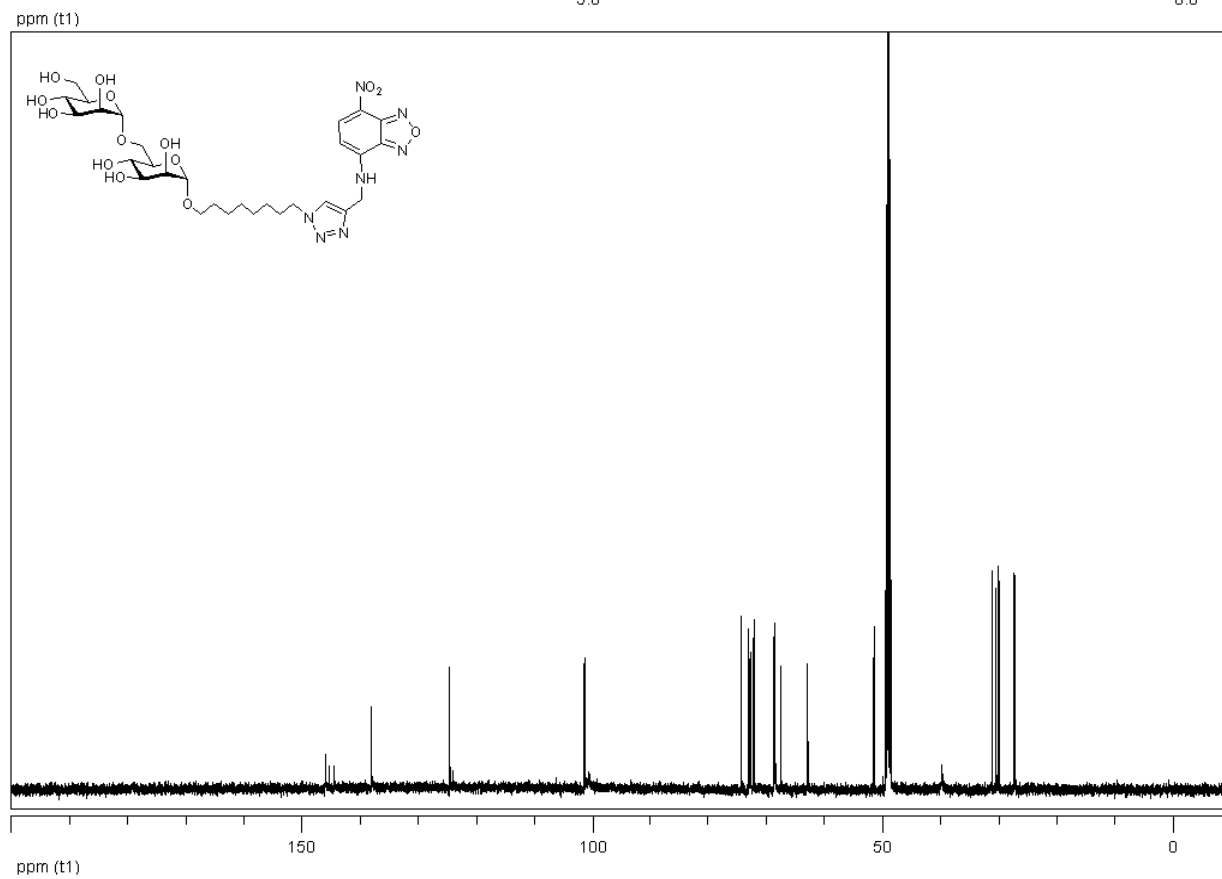

**4-[(7-Nitrobenzofurazan-4-yl)aminomethyl]-triazol-1-yloctyl ( $\alpha$ -D-mannopyranosyl)-(1 $\rightarrow$ 6)-( $\alpha$ -D-mannopyranosyl)-(1 $\rightarrow$ 6)- $\alpha$ -D-mannopyranoside (6)**

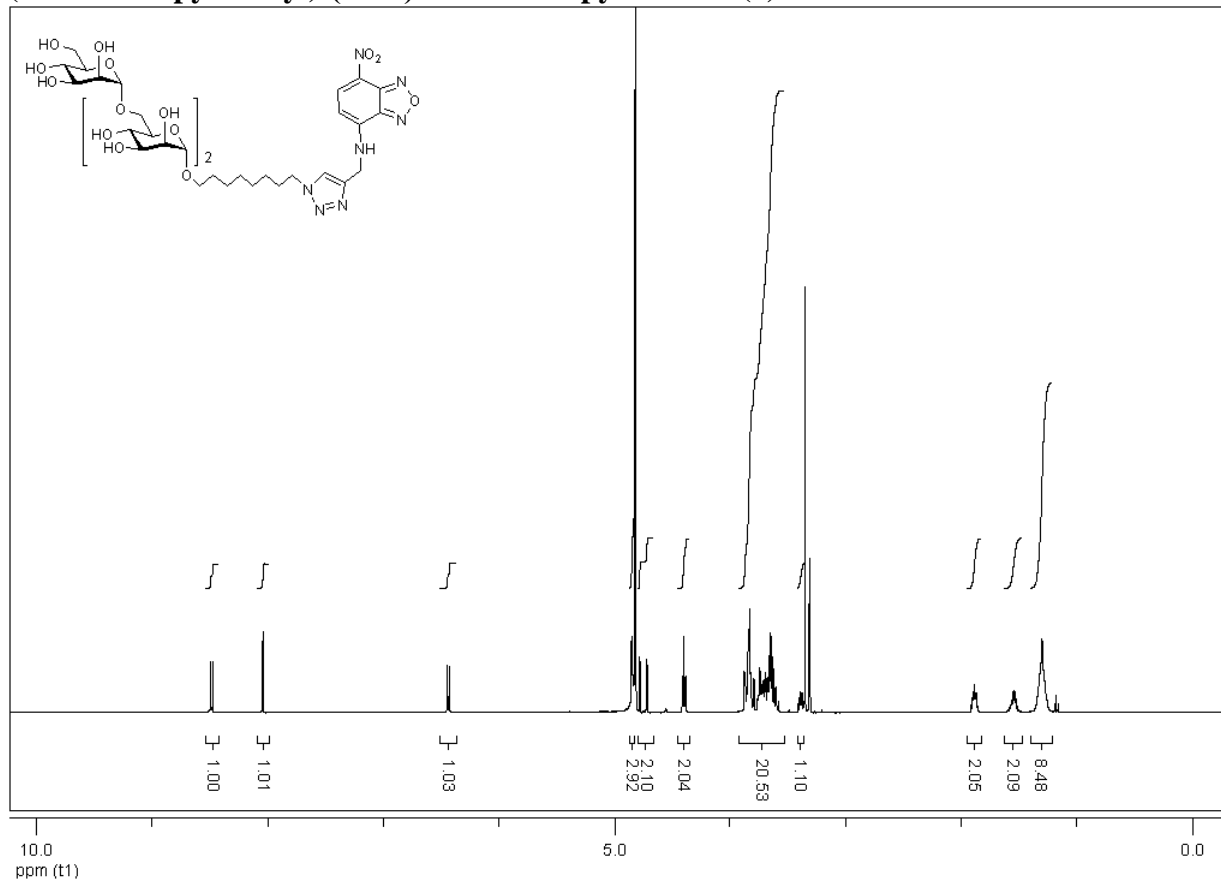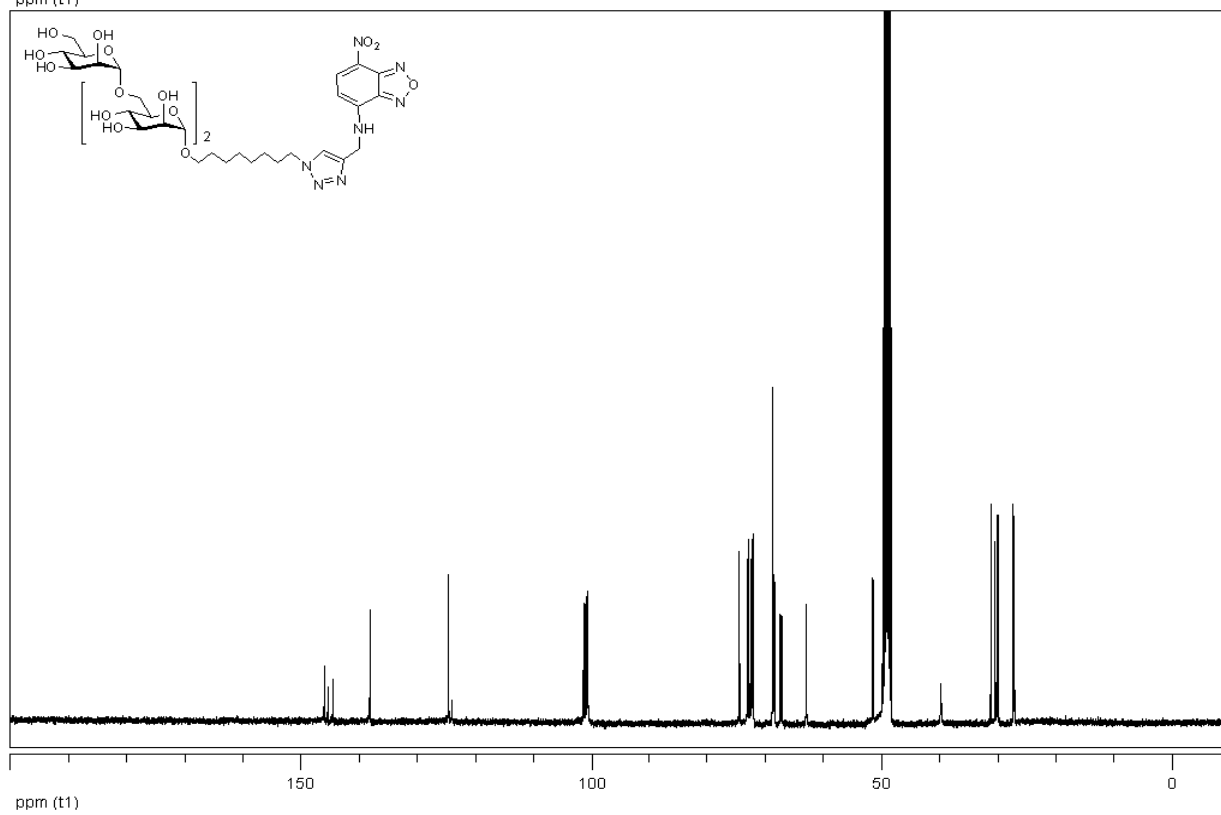



**4-[(7-Nitrobenzofurazan-4-yl)aminomethyl]-triazol-1-yl-octyl ( $\alpha$ -D-mannopyranosyl)-(1 $\rightarrow$ 2)-( $\alpha$ -D-mannopyranosyl)-(1 $\rightarrow$ 6)- $\alpha$ -D-mannopyranoside (7)**

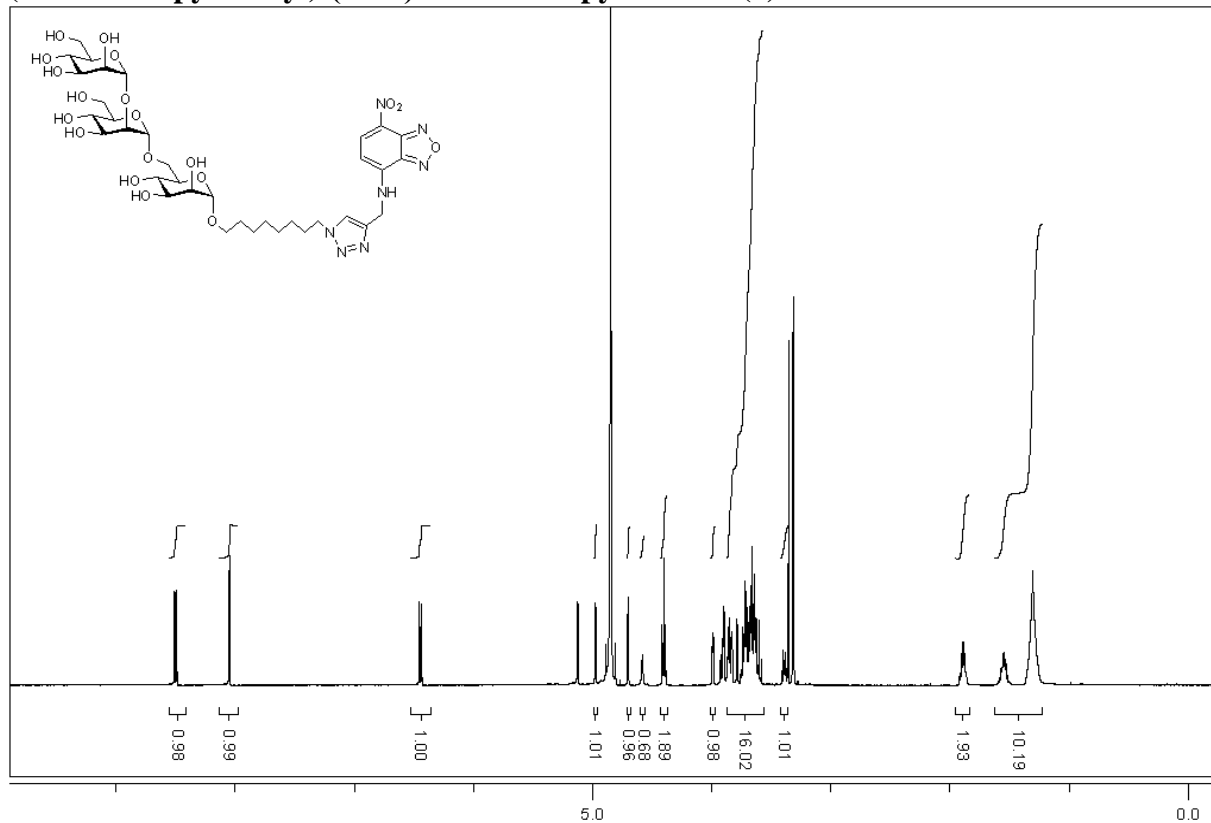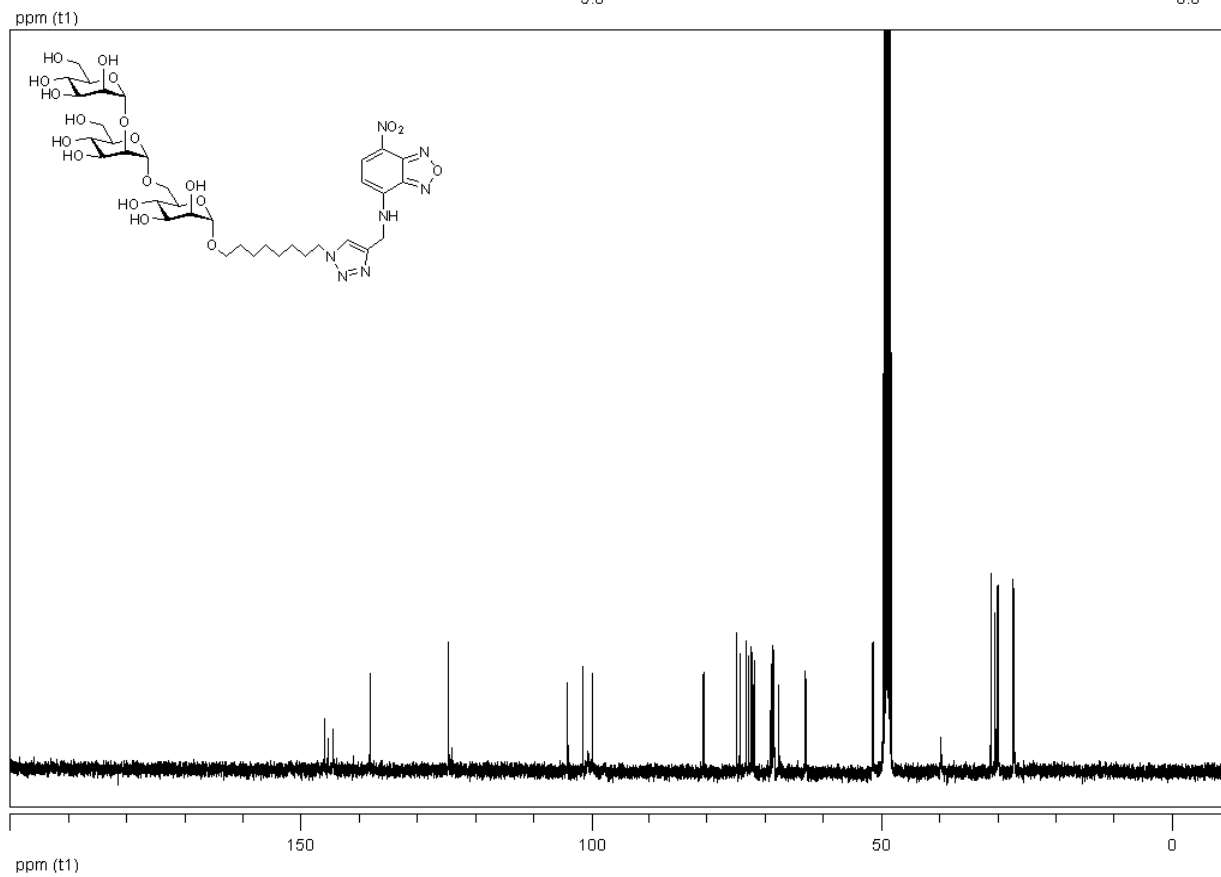

**8-(2-Ethoxycylobutene-3,4-dione-1-ylamino)octyl ( $\alpha$ -D-mannopyranosyl)-(1 $\rightarrow$ 6)-( $\alpha$ -D-mannopyranosyl)-(1 $\rightarrow$ 6)- $\alpha$ -D-mannopyranoside (8)**

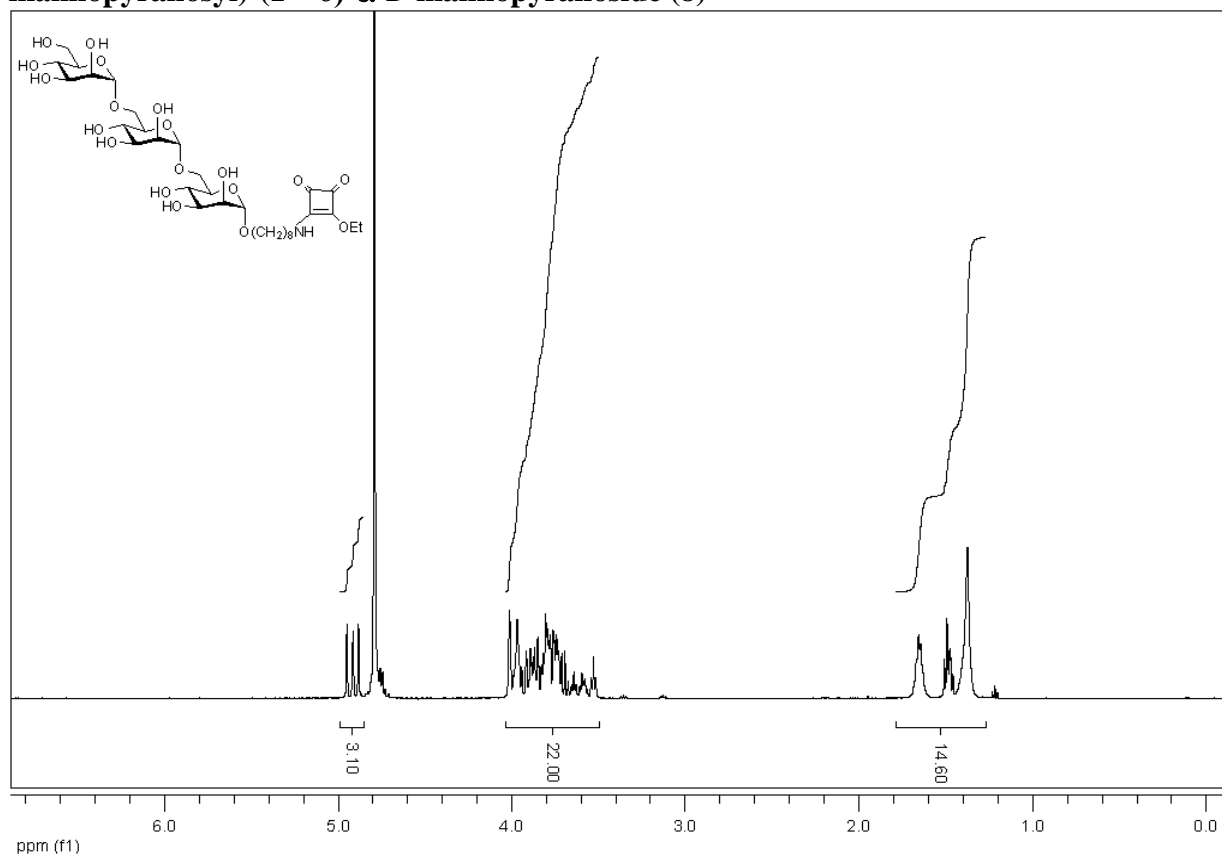

**8-(2-Ethoxycyclobutene-3,4-dione-1-ylamino)octyl ( $\alpha$ -D-mannopyranosyl)-(1 $\rightarrow$ 2)-( $\alpha$ -D-mannopyranosyl)-(1 $\rightarrow$ 6)- $\alpha$ -D-mannopyranoside (9)**

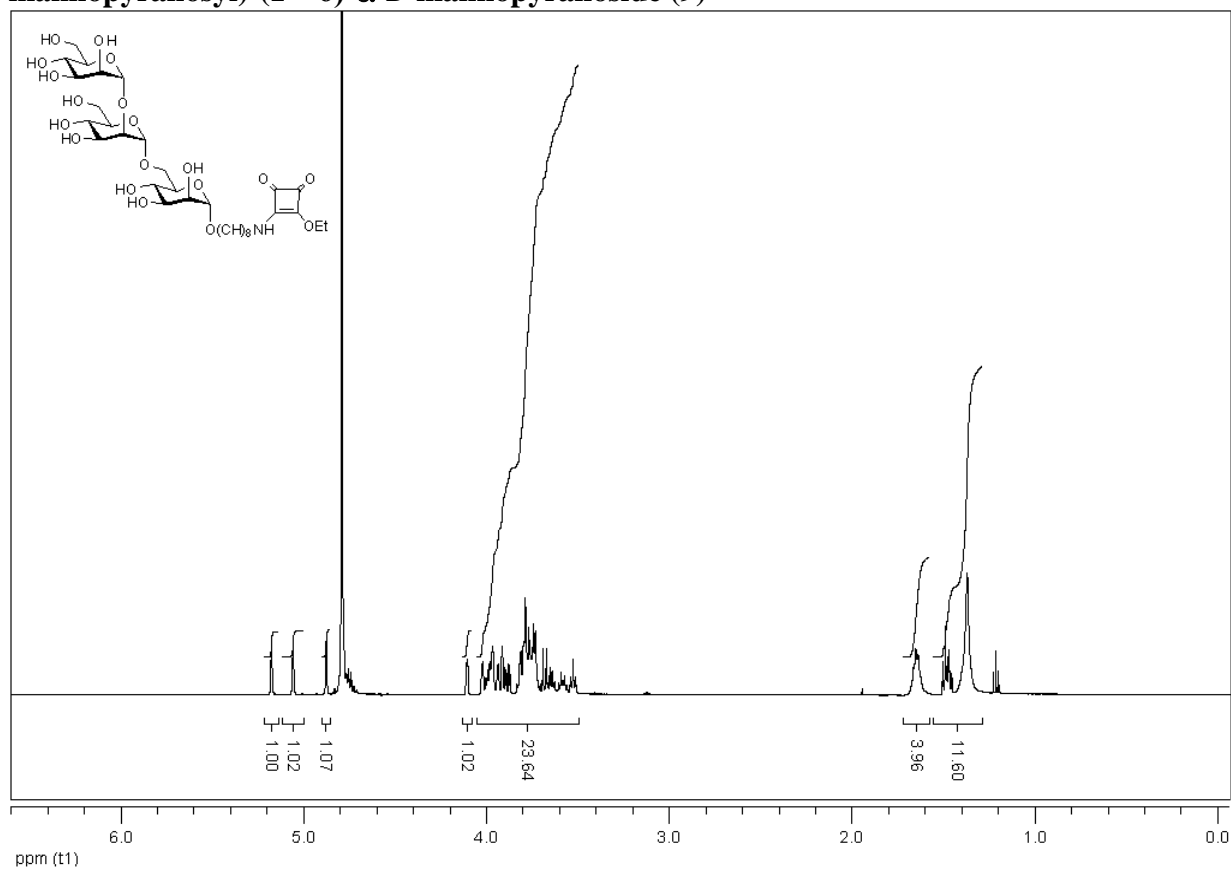

**8-(2-Ethoxycyclobutene-3,4-dione-1-ylamino)octyl 2,6-di-O- $\alpha$ -D-mannopyranosyl- $\alpha$ -D-mannopyranoside (10)**

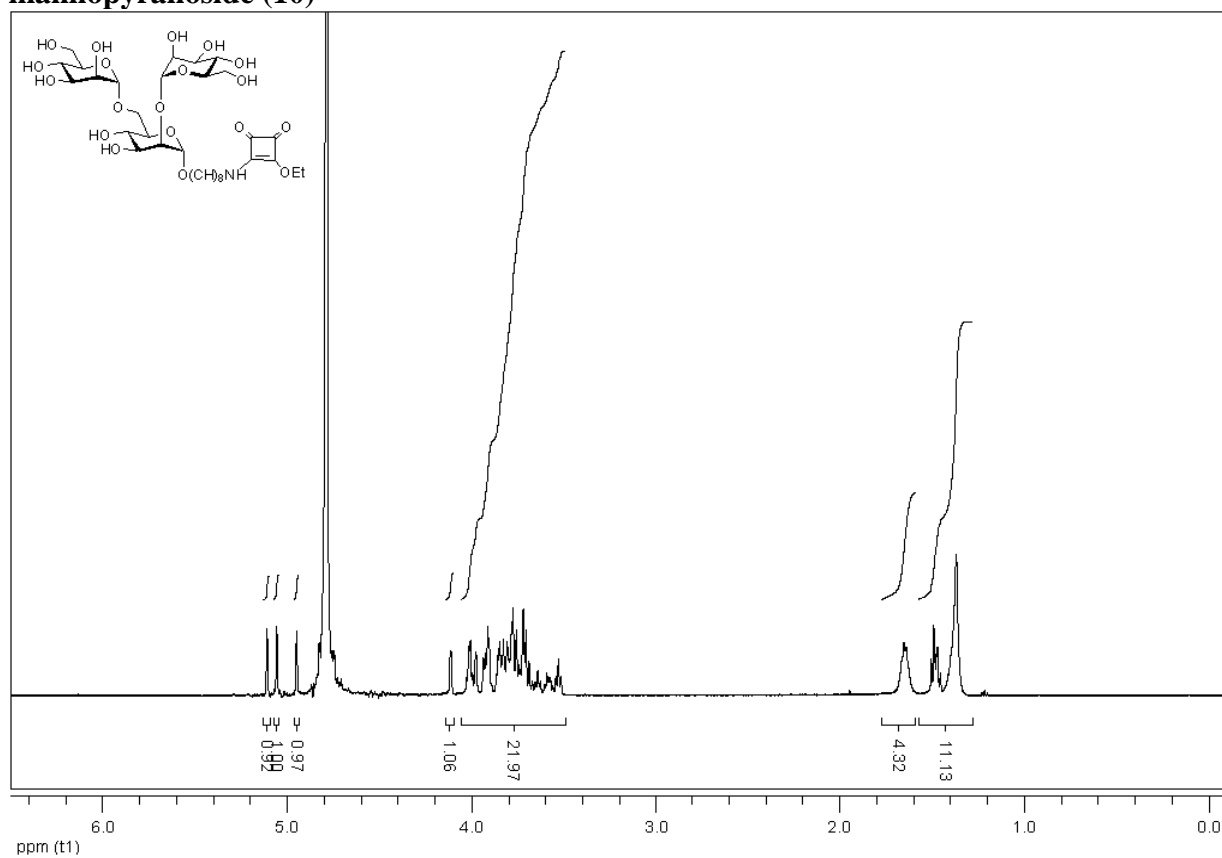

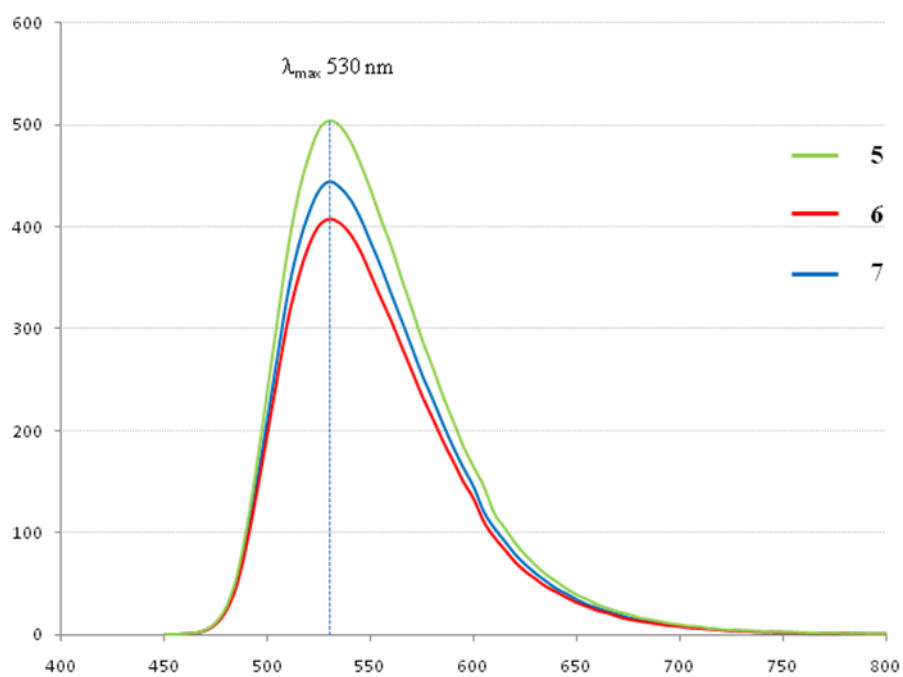

**Figure 1:** Fluorescence emission spectra of the NBD-labelled neoglycoconjugates **5–7**.

$\lambda_{ex} = 400 \text{ nm}$  at  $0.1 \text{ mg ml}^{-1}$  in water.

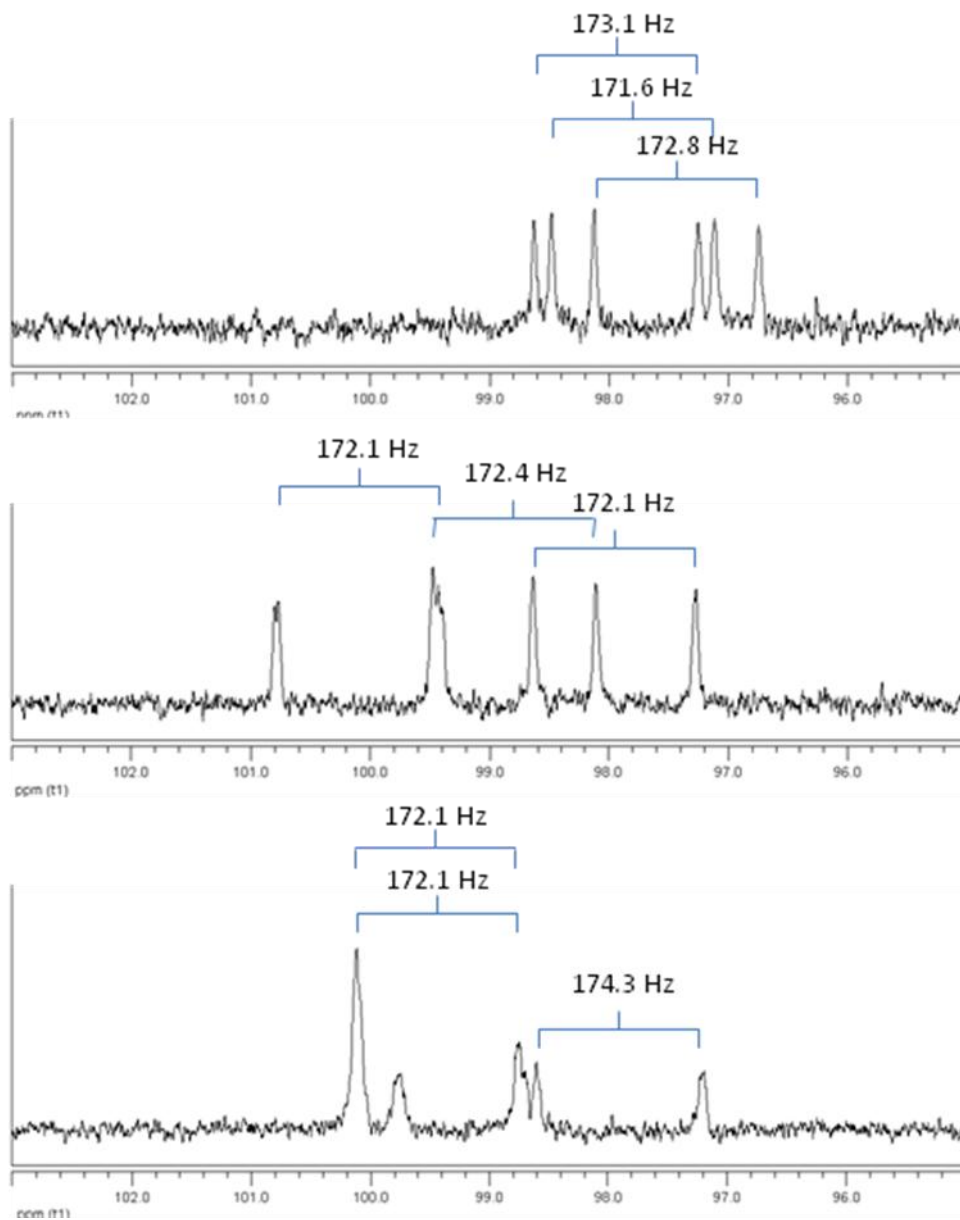

**Figure 2:** 125 MHz  $^1\text{H}$  coupled  $^{13}\text{C}$  spectra of trisaccharides **25**, **28** and **29**.  $^1J_{\text{C,H}}$  values of anomeric carbons are indicated.
